# Supplementary material for: Impact of participant attrition on child injury outcome estimates: a longitudinal birth cohort study in Australia
Source: PubMed Central journal article supplement — BMJ Open. 2017 Jun 30;7(6):e015584. doi: 10.1136/bmjopen-2016-015584 (PMC5734245; doi:10.1136/bmjopen-2016-015584), 2017-06-30
Supplement: bmjopen-2016-015584.draft_revisions.pdf [file bmjopen-2016-015584.draft_revisions.pdf]

# BMJ Open

## Impact of participant attrition on child injury outcome estimates in an Australian longitudinal birth cohort

|                                 |                                                                                                                                                                                                                                                                                                                                                                        |
|---------------------------------|------------------------------------------------------------------------------------------------------------------------------------------------------------------------------------------------------------------------------------------------------------------------------------------------------------------------------------------------------------------------|
| Journal:                        | <i>BMJ Open</i>                                                                                                                                                                                                                                                                                                                                                        |
| Manuscript ID                   | bmjopen-2016-015584                                                                                                                                                                                                                                                                                                                                                    |
| Article Type:                   | Research                                                                                                                                                                                                                                                                                                                                                               |
| Date Submitted by the Author:   | 17-Dec-2016                                                                                                                                                                                                                                                                                                                                                            |
| Complete List of Authors:       | Cameron, Cate; Griffith University, Menzies Health Institute<br>Osborne, Jodie; Griffith University<br>Spinks, Annelies; CSIRO<br>Davey, TM; The University of Queensland<br>Sipe, Neil; University of Queensland, School of Geography, Planning and Environmental Management<br>McClure, Rod; Harvard School of Public Health, Harvard Injury Control Research Center |
| <b>Primary Subject Heading</b>: | Epidemiology                                                                                                                                                                                                                                                                                                                                                           |
| Secondary Subject Heading:      | Epidemiology, Research methods                                                                                                                                                                                                                                                                                                                                         |
| Keywords:                       | EPIDEMIOLOGY, STATISTICS & RESEARCH METHODS, PUBLIC HEALTH                                                                                                                                                                                                                                                                                                             |
|                                 |                                                                                                                                                                                                                                                                                                                                                                        |

SCHOLARONE™  
Manuscripts

Peer Review Only

# Impact of participant attrition on child injury outcome estimates in an Australian longitudinal birth cohort

**Type of Manuscript:** Original Article

**Authors:** Cate M. Cameron,<sup>a</sup> Jodie M. Osborne,<sup>a</sup> Anneliese B. Spinks,<sup>b,c</sup> Tamzyn M. Davey,<sup>d</sup> Neil Sipe,<sup>e</sup> Roderick J. McClure.<sup>f</sup>

## Addresses:

<sup>a</sup> Menzies Health Institute Queensland, Griffith University, Meadowbrook, Australia.

<sup>b</sup> Commonwealth Scientific and Industrial Research Organisation (CSIRO), Dutton Park, Australia.

<sup>c</sup> School of Medicine, Griffith University, Meadowbrook, Australia.

<sup>d</sup> The University of Queensland, School of Public Health, Herston, Australia.

<sup>e</sup> School of Geography, Planning and Environmental Management, The University of Queensland, St Lucia, Australia.

<sup>f</sup> Harvard Injury Control Research Center, Harvard School of Public Health, Boston, USA.

**Corresponding Author:** Dr Cate Cameron, Menzies Health Institute Queensland, Griffith University, University Drive, Meadowbrook, Australia, 4131. Email: [cate.cameron@griffith.edu.au](mailto:cate.cameron@griffith.edu.au), Telephone (07) 338 21289, Facsimile (07) 338 21414.

**Word Count:** Abstract: 248 words; Text: 2993

**Authorship contributions:** CMC, JMO, ABS, TMD, NS, RJM were involved in study concept and design. JMO and CMC acquired the data. CMC conducted the data management and analysis. CMC, JMO and RJM were all involved in interpretation of data wrote the first draft of the manuscript. CMC, JMO, ABS, TMD, NS, RJM contributed to the critical revision of the manuscript and approved the final version.

## KEY WORDS

Attrition, child injury, epidemiology, longitudinal research, data linkage, methods

## ABSTRACT

### Background

Longitudinal research is subject to participant attrition. Systemic differences between retained participants and those lost to attrition potentially bias prevalence of outcomes, as well as exposure-outcome associations. This study examines the impact of attrition on the prevalence of child injury outcomes and the association between sociodemographic factors and child injury.

### Methods

Participants were recruited as part of the Environments for Healthy Living (EFHL) birth cohort study. Baseline data was drawn from maternal surveys. Child injury outcome data was extracted from hospital records, 2006-2013. Participant attrition status was assessed up to 2014. Rates of injury related episodes of care were calculated, taking into account exposure time and Poisson regression was performed to estimate exposure-outcome associations.

### Results

Of the 2222 participating families, 799 families (36.0%) had complete follow up data. Those with incomplete data included 137 (6.2%) who withdrew, 308 (13.8%) were lost to follow up and 978 families (44.0%) who were partial/non-responders. Families of lower socio-economic status were less likely to have complete follow up data ( $p < 0.05$ ). Systematic differences in attrition did not result in differential child injury outcomes or significant differences between the attrition and non-attrition groups in risk factor effect estimates. Participants who withdrew were the only group to demonstrate differences in child injury outcomes.

### Conclusion

This research suggests that even with considerable attrition, if the proportion of participants who withdraw is minimal, overall attrition is unlikely to affect the population prevalence estimate of child injury or measures of association between sociodemographic factors and child injury.

**STRENGTHS AND LIMITATIONS OF THIS STUDY**

- Uses a mixed active-passive cohort design from a birth cohort study that employed both data linkage and direct participant follow-up to ascertain comprehensive exposure and outcome data.
- Ability to examine impact of participant attrition on outcome estimates using complete data.
- Relatively small sample size. The adjusted model removed significance even though there was little change in the point estimate and could represent a type 2 error.

er review only

## INTRODUCTION

Longitudinal birth cohort studies are invaluable for exploring the impact of early environments (physical, social and economic) on a child's ongoing health and development.<sup>1</sup> One of the greatest threats to the validity of this research design is bias due to participant attrition.<sup>2</sup> Attrition can occur as a result of a participant actively withdrawing from the study, relocating and becoming lost to follow up or not responding to follow up waves.

Research examining attrition in longitudinal studies has identified systemic differences between responders and non-responders across a range of individual, family, social, demographic and health characteristics, with disadvantaged populations generally having higher rates of attrition.<sup>3-8</sup> Systemic characteristic differences have also been found between participant groups according to the reason for attrition.<sup>6, 9, 10</sup> In line with epidemiological principles, it is anticipated that these differences will result in a bias of outcome prevalence and exposure-outcome associations. However, whilst evidence of a link between attrition and prevalence bias has been reported in the literature, there is less evidence of attrition leading to bias in exposure-outcome associations, and the bias effect can vary depending on the nature of the outcomes under investigation.<sup>3-5, 7, 11</sup>

Within the context of longitudinal birth studies, the impact that attrition bias has on child injury outcomes is an important area for further research. To date, the majority of attrition-injury studies have focused on participants recruited after injury has already occurred, or older populations.<sup>12-22</sup> In these studies, attrition has been linked to socio-economic and participant characteristics, causes of injury, injury severity and treatment plans. Extending this research to include longitudinal research on outcomes for young children in a broader population will greatly enhance our understanding of this relationship.

Using data linkage of routinely collected administrative health records with participant survey data, provides researchers new opportunities to assess the impact of attrition bias on participant outcomes in prospective longitudinal studies.<sup>23</sup> Data linkage can provide comprehensive access to outcomes

1  
2  
3 data for the total cohort group, allowing comparisons of outcomes to be made between participants  
4 who are active and those who have been lost from 'active' (survey) follow up.  
5  
6

7 In this manuscript we report the use of a mixed direct participant contact (including surveys) and  
8 linked data design in a longitudinal birth cohort study to examine the impact of participant attrition  
9 bias on child injury outcome estimates. In particular, the research will i) identify whether there are  
10 systematic differences in attrition, and ii) examine the impact of attrition on both the prevalence of  
11 child injury outcomes and the association between sociodemographic variables and child injury.  
12  
13  
14  
15  
16

## 17 18 **METHODS**

### 19 20 **Study Design**

21  
22 This cohort study combined survey and linked administrative health data.  
23  
24  
25

### 26 27 **Environments for Healthy Living (EFHL): Griffith Birth Cohort Study**

28  
29 The EFHL study is a longitudinal birth cohort which investigates how social, environmental,  
30 neighbourhood, family, maternal and individual factors impact a child's health and development.<sup>24</sup>  
31 Pregnant women in their third trimester were recruited between 2006 and 2011 at one of three public  
32 maternity hospitals in South East Queensland and Northern New South Wales. EFHL has been  
33 included on the Australian and New Zealand Clinical Trials Registry (ACTRN12310000931077). The  
34 study methodology and baseline characteristics of the sample have been comprehensively described in  
35 other papers.<sup>24, 25</sup> The EFHL sample was largely characteristic of births in the region, however,  
36 consistent with the public hospital setting from which participants were recruited, there was a higher  
37 than national average representation of families with lower incomes, younger maternal age, more  
38 overseas born parents and higher proportions of maternal smoking in pregnancy.<sup>25</sup>  
39  
40  
41  
42  
43  
44  
45  
46  
47  
48  
49

### 50 51 **Participants**

52  
53 Participants were families enrolled in the EFHL project at one of the two Queensland based public  
54 hospitals in the region (Logan or Gold Coast Hospital). This allowed direct comparison to Queensland  
55  
56  
57  
58  
59  
60

1  
2  
3 Health child hospital records. Participants were selected from those recruited in the years 2006 to  
4 2010 only, as these cohorts had completed more than one follow up survey. Cases of maternal and  
5 child death were excluded.  
6  
7

### 8 9 **Ethical considerations**

10  
11  
12 Ethics approval was provided by the participating hospitals and by the Human Research Ethics  
13 Committees of Griffith University and the University of Queensland.  
14  
15

### 16 17 **Data sharing**

18  
19 No additional data available.  
20  
21

### 22 23 **Participant consent**

24  
25 Written, informed maternal consent for data used in this analysis was obtained for (1) direct  
26 participant contact including the completion of baseline and follow up surveys; (2) release of hospital  
27 perinatal records and (3) for data to be linked to the child's administrative health records including  
28 hospital admission and emergency department presentations.  
29  
30  
31  
32  
33

### 34 35 **Data Sources and Collection**

#### 36 37 *Baseline Social, Maternal and Household Variables*

38  
39 Baseline information was collected from hospital perinatal records and from a self-administered  
40 survey completed by mothers during pregnancy. This baseline survey covered a range of maternal,  
41 household and community factors. The child characteristics included in this analysis were gender and  
42 age, via length of follow-up. Maternal characteristics included the level of education completed;  
43 maternal age at baseline and whether the mother smoked during her pregnancy. Household factors  
44 included marital status, whether other children resided in the home, housing status (owned, rented,  
45 government/boarding house) and household income level. Household income was divided into  
46 quintiles.<sup>25</sup>  
47  
48  
49  
50  
51  
52  
53  
54  
55  
56  
57  
58  
59  
60

### *Cohort Attrition Status*

Information on participant attrition status was collected from the EFHL participant tracking database. Records were kept on both the participant's overall recruitment status, as well as on their participation in follow up surveys up to May 2014.

Participants were categorised into two groups; (1) those with complete follow-up or (2) those with incomplete follow-up. Participants with complete follow-up included those that had returned all follow-up surveys relevant to their age group and who had not withdrawn during the lifetime of the project.

Participants with incomplete follow-up were categorised into one of three groups. (1) The "withdrawn" group included any participant who had actively asked to be withdrawn from direct participant contact and ongoing survey completion. Consent was retained for the use of existing data and linked administrative data. (2) "Lost to follow-up", included those participants who did not respond to follow-up surveys and who could no longer be contacted through their home address, phone, email or emergency contact addresses. (3) "Partial or Non Responders" included people who were locatable, had not withdrawn, but had not completed one or more follow up surveys beyond the initial baseline survey.

### *Administrative Health Data*

The child's health records were extracted between 2006 and 2013 from the Queensland Emergency Department Information System (EDIS) and from the Queensland Hospital Admitted Patients Data Collection (QHAPDC). The Queensland Department of Health used linkage software, based on deterministic and probabilistic methods, to link demographic, child and maternal information to hospital records. Manual clerical reviews of the data were undertaken by staff when required.

### **Outcome Measure**

Injury related a hospital or Emergency Department (ED) episode of care was the outcome of interest. Multiple admissions, nested admissions and any corresponding hospital or ED presentations relating



1  
2  
3 to the one injury event were identified through dates of presentations, transfer codes combined with  
4 diagnostic fields. These records were subsequently collapsed into one episode of care for the injury  
5 event.  
6  
7

### 8 9 *Injury Classification*

10  
11  
12 Injury presentations were classified using ICD-10-AM, Chapter 19 Injury and Poisonings (S00-T98)  
13 and Chapter 20 External Causes (U50-Y98), with late effects from injury excluded. EDIS data  
14 contains only a single diagnostic field in which to describe the reason for presentation, whereas  
15 QHAPDC contains a primary diagnosis field and multiple other diagnostic fields in which external  
16 causes and activity codes may be recorded. Researchers checked text descriptions in the EDIS data to  
17 identify any injuries that were not captured in the single diagnosis field. Almost all ED records used  
18 the one available diagnostic field to classify the nature of the injury (S00-T98). External cause codes  
19 (V01-Y98) were used in less than 5% of ED records. As a result, injury cause codes were only  
20 available comprehensively for the inpatient episodes of care. Injury subgroups were defined and  
21 matched to the ICD-10-AM chapter subcategories.  
22  
23  
24  
25  
26  
27  
28  
29  
30  
31

### 32 33 *Calculation of Person Years*

34  
35 The length of follow up for injury related hospital treatment varied considerably across participants.  
36 Individual person-years (PYs) were calculated for each child, based on the time between birth and 31  
37 December 2013 in which he or she was residing in the state of Queensland, alive and eligible for  
38 health care.  
39  
40  
41  
42  
43

### 44 45 **Analysis**

46  
47 Data cleaning and analyses were undertaken using SAS 9.4 software. The statistical significance of  
48 differences between groups was assessed by Pearson's chi-squared test for categorical data. Using the  
49 state-wide linked administrative health data, injury related episodes of care were obtained for all  
50 cohort participants. Rates of injury related episodes of care were calculated, taking into account PYs  
51 exposure time, for each factor and by attrition status (rates/10PYs).  
52  
53  
54  
55  
56  
57  
58  
59  
60

Poisson regression was performed to estimate crude and adjusted rate ratios (RRs) between multiple exposure factors (child, maternal and household characteristics) and the outcome (count of child injury related episodes of care). All factors significant in the univariate analyses associated with injury were included in the model. The log of individual PYs of exposure time was included as an offset. The final model included child gender, maternal age and maternal education. Complete case analysis was employed with two-sided significance set at a level of 5%.

## RESULTS

In total, 2222 families who enrolled in the EFHL study from 2006-2010, at the two participating Queensland hospitals, were included in this analysis. The number of children totalled 2245 (including 23 sets of twins). Maternal age ranged from 16 to 48 years with a mean age of 28.9 years (SD± 5.98). At the time of enrolment, 14.1% of the households were sole parent families, 28.2% of maternal participants smoked cigarettes, 34.9% had no other children living in the household and 22.7% of the maternal participants had not completed secondary school.

### Attrition Status and Follow-up

Of the 2222 participating families, 799 families (36.0%) had complete follow-up, 137 (6.2%) were withdrawn, 308 (13.8%) were lost to follow-up and 978 families (44.0%) were partial or non-responders (Figure 1).

*Insert Figure 1 about here.*

Follow-up consisted of a total of 11,908.3 PYs from birth to seven years of age, with a mean 5.3 PYs per child (range 0-7). Automated linkage and manual searching found records in QHAPDC for 97.1% of all EFHL child participants, including their birth record, and records in EDIS for 44.7% of participants.

### **Baseline Demographic, Household and Child Characteristics by Attrition Status**

Baseline demographic and household characteristics differed significantly between participants who had complete follow up compared to those families who had incomplete follow up. Attrition families were more likely to have lower levels of maternal education, lower maternal age, have higher rates of maternal smoking, be single parent households, have more children residing in the home, have lower gross household incomes and live in rental or government boarding housing (all  $p < 0.0001$ ). However there were no differences in the proportion of child gender for active families compared to attrition families (Table 1).

*Insert Table 1 about here.*

These baseline characteristic differences were similar for two of the three attrition groups, lost to follow-up and partial/non-responders. However, those families in the withdrawn group were more similar in baseline characteristics to the families in the complete follow up group, with the exception of maternal age, marital status and gross household income (Table 1). Of note, families in the withdrawn group were more likely to have male children than those families who fully participated ( $p < 0.01$ )

### **Prevalence Rates of Childhood Injury by Attrition Status**

The total cohort had an overall child injury rate of 2.59/10PYs, similar to the child injury rate for those families with complete follow up (2.60/10PYs) and those families who were lost to follow-up or partial/non-responders (Table 2). However, families in the withdrawn group had significantly higher rates of child injury compared to families with complete follow up with an unadjusted RR=1.32 (95% CI 1.03-1.68). While there was little reduction in the effect size after adjusting for co-variates, the difference in child injury rates for families who withdrew compared to families with complete follow up was no longer statistically significant, with an adjusted RR=1.24 (95% CI 0.96-1.58). (Table 2).

*Insert Table 2 about here.*

## Relationship between Baseline Sociodemographic Variables (exposure) and Child Injury Episodes (outcome) by Attrition Status

For the total cohort, rates of child injury increased as the level of maternal education, maternal age and gross household income decreased (Table 3). Rates of child injury were higher in single parent households, families living in government or boarding house accommodation and for families with male children. This distribution was similarly reflected in both the families with complete follow up and those lost to attrition, with no statistically significant differences in the demographically stratified rates of child injury when comparing overall attrition status ( $p>0.05$ ) (Table 3).

*Insert Table 3 about here.*

While the direction of the demographically stratified child injury rates was similar for all attrition groups, the magnitude of this difference was greater in the withdrawn group for a number of baseline factors. Child injury rates for families that withdrew were higher than families with complete follow up for all baseline factors, but most pronounced with respect to child gender, maternal education, maternal smoking, number of children living in the household and home ownership ( $p<0.05$ ).

## DISCUSSION

This study examined the impact of attrition in child injury research on the prevalence of child injury outcomes and the association between sociodemographic variables and injury (exposure-outcome relationship). There were three key findings. First, participants with incomplete follow up, as a group, differed from complete responders across most sociodemographic characteristics and there were also differences in these characteristics across attrition types (within the incomplete follow up group). Second, despite these systematic differences, there were no statistically significant impacts on the overall injury prevalence estimates and risk factor effect estimates, with the exception of the withdrawn group. The withdrawn group differed least, however, from the complete group in sociodemographic characteristics. Third, despite these systemic differences, the direction and nature of the sociodemographic-child injury relationship did not vary across the attrition groups.

1  
2  
3 The finding that there were systemic differences in the baseline social, maternal, and household  
4 characteristics of those with complete follow up versus those lost to attrition is consistent with  
5 previous research in this area, with families categorised as having lower socioeconomic status less  
6 likely to remain as active participants in the study.<sup>3, 5, 9, 10</sup> Systematic differences in attrition were also  
7 evident across attrition groups, as has been demonstrated in previous research.<sup>9, 10</sup> Interestingly, whilst  
8 families from the 'lost to follow up' and 'partial/non responder' groups were more likely to be of  
9 lower socioeconomic status, our withdrawn participants were more similar in their baseline  
10 characteristics to participants with complete follow up. It may be that families of higher  
11 sociodemographic status felt more confident to actively withdraw from this research or that there are  
12 unmeasured characteristics in these families that lead to higher rates of withdrawal. Further research is  
13 warranted given the relatively small sample size of this withdrawn group.  
14  
15  
16  
17  
18  
19  
20  
21  
22  
23  
24

25 Consistent with previous research,<sup>3, 4, 26</sup> it was anticipated that systemic differences in attrition would  
26 result in differences in the prevalence of child injury outcomes across our groups (attrition-child  
27 injury), particularly as the relationship between lower sociodemographic factors and child injury has  
28 been well documented in the literature.<sup>27-30</sup> However, there were no statistically significant impacts of  
29 this differential attrition on the overall injury prevalence estimates and risk factor effect estimates.  
30 The only apparent suggestion of difference (albeit with the observed stable effect losing significance  
31 with inclusion of multiple variables in the model) was in the withdrawn group, despite this group  
32 differing least from the "complete follow up" group for all measures of SES, compared to the other  
33 attrition categories. It should be noted though that the withdrawn group was small in absolute terms  
34 (i.e. <5% of the total cohort) and had the group been larger, it could have impacted on the overall  
35 prevalence of the outcome. This suggests that reasons for attrition may need to be examined in  
36 epidemiological research, as a high proportion of withdrawals may indicate the potential for bias.  
37  
38  
39  
40  
41  
42  
43  
44  
45  
46  
47  
48  
49

50 Importantly, the systemic differences in attrition also had little impact on the direction of the  
51 relationship between sociodemographic factors and child injury, with lower socioeconomic status  
52 families having higher rates of injury across all the attrition groups. This finding adds to a growing  
53 body of evidence indicating that selective attrition does not necessarily impact the relationship  
54  
55  
56  
57  
58  
59  
60

1  
2  
3 between a range of exposure-outcome measures.<sup>3,4,10</sup> With follow up rates for cohort studies regularly  
4 being reported in the 30-70% range,<sup>31</sup> it is promising that these results suggest exposure-outcome  
5 findings from studies with large amounts of attrition may not need to be interpreted with the degree of  
6 caution currently applied.  
7  
8  
9

10  
11 A key strength of this study was the mixed active-passive nature of the cohort design. Prior to the first  
12 published results from this study, there had been few birth cohort studies that employed data linkage  
13 methodology in combination with active participant contact (survey follow up) to ascertain  
14 comprehensive exposure and outcome data. Thus, this is one of the few studies capable of examining  
15 with rigour the questions we have addressed in this research. The key limitation is the relatively small  
16 sample size. This was particularly evident in relation to our main finding that it was in the group of  
17 participants who withdrew from the study that we found a bias. The adjusted model removed  
18 significance of the main finding even though there was little change in the point estimate (from 1.32  
19 to 1.24) and could represent a type 2 error. The second limitation relates to the nature of the study  
20 sample, the determinant variables measured and the injury outcome focus of the analysis. While the  
21 research results could be expected to apply to similar circumstances, it is unknown how validly the  
22 study findings should be applied beyond the study group we examined.  
23  
24  
25  
26  
27  
28  
29  
30  
31  
32  
33  
34  
35

36 The findings of this research provide support for relaxing one of the most challenging expectations of  
37 epidemiological studies; that is, complete participant follow up. Even with considerable attrition,  
38 when proportions of participants who withdraw from the study are low, attrition bias is unlikely to  
39 affect either the population prevalence estimate or measures of association with key study variables.  
40  
41  
42  
43  
44  
45

#### 46 **ACKNOWLEDGMENTS**

47  
48 The research reported in this publication is part of the Environments for Healthy Living (EFHL):  
49 Griffith Study of Population Health (Australian and New Zealand Clinical Trials Registry:  
50 ACTRN12610000931077). The EFHL project was conceived by Professor Rod McClure, Dr Cate  
51 Cameron, Professor Judy Searle and Professor Ronan Lyons. We are thankful for the contributions of  
52 the Project Manager, Rani Scott, and the current and past Database Managers. We gratefully  
53  
54  
55  
56  
57  
58  
59

1  
2  
3 acknowledge the administrative staff, research staff, and the hospital antenatal and birth suite  
4 midwives of the participating hospitals for their valuable contributions to the study, in addition to the  
5 expert advice provided by Research Investigators throughout the project.  
6  
7

## 8 9 10 **FUNDING**

11  
12 This study was funded by an Australian Research Council Discovery Grant [DP110105423]. Core  
13 funding to support EFHL is provided by Griffith University. Dr Cameron was supported by a Public  
14 Health Fellowship (ID 428254) from the NHMRC.  
15  
16  
17

## 18 19 **COMPETING INTERESTS**

20  
21  
22 The authors do not have any competing interests in relation to this research.  
23  
24  
25  
26  
27  
28  
29  
30  
31  
32  
33  
34  
35  
36  
37  
38  
39  
40  
41  
42  
43  
44  
45  
46  
47  
48  
49  
50  
51  
52  
53  
54  
55  
56  
57  
58  
59  
60

## REFERENCES

1. Western M, Haynes M, Baffour B, et al. The Case for a New Australian Birth Cohort Study: Institute for Social Science Research, University of Queensland; 2015.
2. Ahern K, Le Brocq R. Methodological Issues in the Effects of Attrition: Simple Solutions for Social Scientists. *Field Methods*. 2005;17(1):53-69.
3. Wolke D, Waylen A, Samara M, et al. Selective drop-out in longitudinal studies and non-biased prediction of behaviour disorders. *The British journal of psychiatry : the journal of mental science*. 2009;195(3):249-56.doi:10.1192/bjp.bp.108.053751.
4. Osler M, Kriebbaum M, Christensen U, et al. Loss to follow up did not bias associations between early life factors and adult depression. *J Clin Epidemiol*. 2008;61(9):958-63.doi:10.1016/j.jclinepi.2007.11.005.
5. Greene N, Greenland S, Olsen J, et al. Estimating bias from loss to follow-up in the Danish National Birth Cohort. *Epidemiology*. 2011;22(6):815-22.doi:10.1097/EDE.0b013e31822939fd.
6. Ng SK, Scott R, Scuffham PA. Contactable Non-responders Show Different Characteristics Compared to Lost to Follow-Up Participants: Insights from an Australian Longitudinal Birth Cohort Study. *Matern Child Health J*. 2016.doi:10.1007/s10995-016-1946-8.
7. Howe LD, Tilling K, Galobardes B, et al. Loss to follow-up in cohort studies: bias in estimates of socioeconomic inequalities. *Epidemiology*. 2013;24(1):1-9.doi:10.1097/EDE.0b013e31827623b1.
8. Aylward GP, Hatcher RP, Stripp B, et al. Who goes and who stays: subject loss in a multicenter, longitudinal follow-up study. *J Dev Behav Pediatr*. 1985;6(1):3-8.
9. Young AF, Powers JR, Bell SL. Attrition in longitudinal studies: who do you lose? *Aust N Z J Public Health*. 2006;30(4):353-61.
10. Powers J, Tavener M, Graves A, et al. Loss to follow-up was used to estimate bias in a longitudinal study: a new approach. *J Clin Epidemiol*. 2015;68(8):870-6.doi:10.1016/j.jclinepi.2015.01.010.
11. Cornish R, Tilling K, Boyd A, et al. Using linkage to electronic primary care records to evaluate recruitment and nonresponse bias in the Avon Longitudinal Study of Parents and Children. *Epidemiology*. 2015;26(4):e41-2.doi:10.1097/EDE.0000000000000288.
12. Jourdan C, Bayen E, Bahrami S, et al. Loss to follow-up and social background in an inception cohort of patients with severe traumatic brain injury: results from the Paris-TBI study. *The Journal of head trauma rehabilitation*. 2016;31(3):E42-E8.
13. Tin Tin S, Woodward A, Ameratunga S. Estimating bias from loss to follow-up in a prospective cohort study of bicycle crash injuries. *Inj Prev*. 2014;20(5):322-9.doi:10.1136/injuryprev-2013-040997.
14. Holavanahalli RK, Lezotte DC, Hayes MP, et al. Profile of patients lost to follow-up in the Burn Injury Rehabilitation Model Systems' longitudinal database. *J Burn Care Res*. 2006;27(5):703-12.doi:10.1097/01.BCR.0000238085.87863.81.
15. Blaha RZ, Arnett AB, Kirkwood MW, et al. Factors influencing attrition in a multisite, randomized, clinical trial following traumatic brain injury in adolescence. *J Head Trauma Rehabil*. 2015;30(3):E33-40.doi:10.1097/HTR.0000000000000059.
16. Corrigan JD, Harrison-Felix C, Bogner J, et al. Systematic bias in traumatic brain injury outcome studies because of loss to follow-up. *Arch Phys Med Rehabil*. 2003;84(2):153-60.doi:10.1053/apmr.2003.50093.
17. Gabbe BJ, Cleland H, Watterson DM, et al. Long term outcomes data for the Burns Registry of Australia and New Zealand: Is it feasible? *Burns : journal of the International Society for Burn Injuries*. 2015;41(8):1732-40.doi:10.1016/j.burns.2015.09.005.
18. Wade SL, Gerry Taylor H, Yeates KO, et al. Long-term parental and family adaptation following pediatric brain injury. *Journal of pediatric psychology*. 2006;31(10):1072-83.doi:10.1093/jpepsy/jsj077.



19. Krellman JW, Kolakowsky-Hayner SA, Spielman L, et al. Predictors of follow-up completeness in longitudinal research on traumatic brain injury: findings from the National Institute on Disability and Rehabilitation Research traumatic brain injury model systems program. *Arch Phys Med Rehabil*. 2014;95(4):633-41.doi:10.1016/j.apmr.2013.10.016.
20. de Groot S, Haisma JA, Post MW, et al. Investigation of bias due to loss of participants in a Dutch multicentre prospective spinal cord injury cohort study. *J Rehabil Med*. 2009;41(5):382-9.doi:10.2340/16501977-0346.
21. Neuner B, Fleming M, Born R, et al. Predictors of loss to follow-up in young patients with minor trauma after screening and written intervention for alcohol in an urban emergency department. *Journal of studies on alcohol and drugs*. 2007;68(1):133-40.
22. Lin C-YA, DeMatteo CA. The Challenges of Loss to Follow-up in Longitudinal Pediatric Acquired Brain Injury Research: One Research Team's Experiences. 2013.
23. Calderwood L, Lessof C. Enhancing longitudinal surveys by linking to administrative data. *Methodology of longitudinal surveys*. 2009:55-72.
24. Cameron CM, Scuffham PA, Spinks A, et al. Environments for Healthy Living (EFHL) Griffith birth cohort study: background and methods. *Matern Child Health J*. 2012a;16(9):1896-905.doi:10.1007/s10995-011-0940-4.
25. Cameron CM, Scuffham PA, Shibl R, et al. Environments For Healthy Living (EFHL) Griffith birth cohort study: characteristics of sample and profile of antenatal exposures. *BMC public health*. 2012b;12:1080.doi:10.1186/1471-2458-12-1080.
26. Mars B, Cornish R, Heron J, et al. Using Data Linkage to Investigate Inconsistent Reporting of Self-Harm and Questionnaire Non-Response. *Archives of suicide research : official journal of the International Academy for Suicide Research*. 2016;20(2):113-41.doi:10.1080/13811118.2015.1033121.
27. Hong J, Lee B, Ha EH, et al. Parental socioeconomic status and unintentional injury deaths in early childhood: consideration of injury mechanisms, age at death, and gender. *Accident; analysis and prevention*. 2010;42(1):313-9.doi:10.1016/j.aap.2009.08.010.
28. Kim M-H, Subramanian SV, Kawachi I, et al. Association between childhood fatal injuries and socioeconomic position at individual and area levels: a multilevel study. *J Epidemiol Community Health*. 2007;61:135-40.doi:doi:10.1136/jech.2006.047738.
29. Laursen B, Nielsen JW. Influence of sociodemographic factors on the risk of unintentional childhood home injuries. *European journal of public health*. 2008;18(4):366-70.doi:10.1093/eurpub/ckn034.
30. Myhre MC, Thoresen S, Groggaard JB, et al. Familial factors and child characteristics as predictors of injuries in toddlers: a prospective cohort study. *BMJ open*. 2012;2(2):e000740.doi:10.1136/bmjopen-2011-000740.
31. Gustavson K, von Soest T, Karevold E, et al. Attrition and generalizability in longitudinal studies: findings from a 15-year population-based study and a Monte Carlo simulation study. *BMC public health*. 2012;12:918.doi:10.1186/1471-2458-12-918.

1  
2  
3  
4  
5  
6  
7  
8  
9  
10  
11  
12  
13  
14  
15  
16  
17  
18  
19  
20  
21  
22  
23  
24  
25  
26  
27  
28  
29  
30  
31  
32  
33  
34  
35  
36  
37  
38  
39  
40  
41  
42  
43  
44  
45  
46  
47

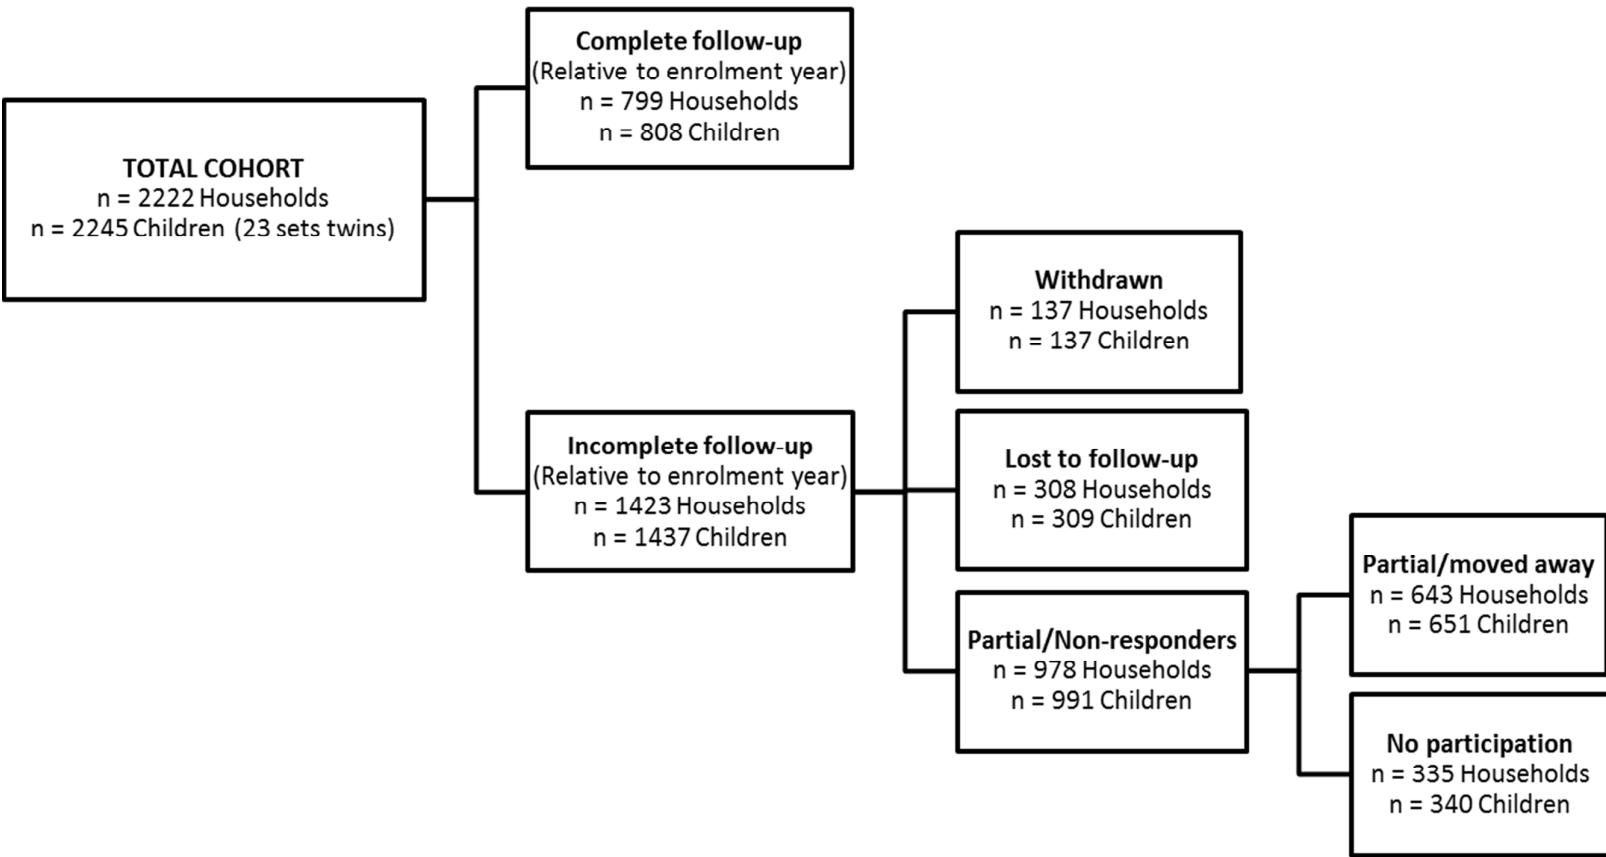

Figure 1 Flow diagram of EFHL cohort attrition status, Queensland participants 2006-2010 only (N=2222 Households and N=2245 Children).

Table 1 Distribution of baseline maternal, household and child characteristics, stratified by follow-up status and types of attrition.

|                                                      | Follow-up         |                     |         | Attrition by type <sup>a</sup> |                               |                                    |
|------------------------------------------------------|-------------------|---------------------|---------|--------------------------------|-------------------------------|------------------------------------|
|                                                      | Complete<br>N (%) | Incomplete<br>N (%) | p-value | Withdrawn<br>N (%)             | Lost to<br>Follow-up<br>N (%) | Partial/Non<br>Responders<br>N (%) |
| <b>MATERNAL CHARACTERISTICS</b>                      | <b>799</b>        | <b>1423</b>         |         | <b>137</b>                     | <b>308</b>                    | <b>978</b>                         |
| <b>Maternal level of education</b> <i>Missing=12</i> |                   |                     |         |                                |                               |                                    |
| Tertiary degree                                      | 192 (24.1)        | 178 (12.6)          | ***     | 24 (17.5)                      | 34 (11.0) ***                 | 120 (12.4) ***                     |
| Secondary school or trade                            | 490 (61.6)        | 849 (60.0)          |         | 89 (65.0)                      | 182 (59.3)                    | 578 (59.6)                         |
| Not complete school                                  | 114 (14.3)        | 387 (27.4)          |         | 24 (17.5)                      | 91 (29.6)                     | 272 (28.0)                         |
| <b>Maternal age</b> <i>Missing=3</i>                 |                   |                     |         |                                |                               |                                    |
| 35+ years                                            | 201 (25.2)        | 228 (16.1)          | ***     | 17 (12.4) ***                  | 53 (17.2) ***                 | 158 (16.2) ***                     |
| 30-34 years                                          | 253 (31.7)        | 308 (21.7)          |         | 37 (27.0)                      | 56 (18.2)                     | 215 (22.0)                         |
| 25-29 years                                          | 228 (28.6)        | 416 (29.3)          |         | 48 (35.0)                      | 83 (26.9)                     | 285 (29.2)                         |
| <25 years                                            | 116 (14.5)        | 469 (33.0)          |         | 35 (25.6)                      | 116 (37.7)                    | 318 (32.6)                         |
| <b>Smoking during pregnancy</b> <i>Missing=9</i>     |                   |                     |         |                                |                               |                                    |
| No                                                   | 640 (80.1)        | 949 (67.1)          | ***     | 102 (74.5)                     | 187 (60.9) ***                | 660 (68.0) ***                     |
| Yes                                                  | 159 (19.9)        | 465 (32.9)          |         | 35 (25.5)                      | 120 (39.1)                    | 310 (32.0)                         |
| <b>HOUSEHOLD CHARACTERISTICS</b>                     | <b>799</b>        | <b>1423</b>         |         | <b>137</b>                     | <b>308</b>                    | <b>978</b>                         |
| <b>Marital status</b> <i>Missing=18</i>              |                   |                     |         |                                |                               |                                    |
| Two parent family                                    | 732 (92.1)        | 1161 (82.4)         | ***     | 106 (77.4) ***                 | 247 (81.2) ***                | 808 (83.5) ***                     |
| Sole parent family                                   | 63 (7.9)          | 248 (17.6)          |         | 31 (22.6)                      | 57 (18.8)                     | 160 (16.5)                         |
| <b>Other children in household</b> <i>Missing=14</i> |                   |                     |         |                                |                               |                                    |
| None                                                 | 299 (37.6)        | 471 (33.4)          | ***     | 53 (39.0)                      | 97 (31.8) ***                 | 321 (33.0) ***                     |
| 1-2 children                                         | 431 (54.2)        | 731 (51.7)          |         | 70 (51.5)                      | 154 (50.5)                    | 507 (52.2)                         |
| 3+ children                                          | 65 (8.2)          | 211 (14.9)          |         | 13 (9.5)                       | 54 (17.7)                     | 144 (14.8)                         |
| <b>Household income</b> <i>Missing=354</i>           |                   |                     |         |                                |                               |                                    |
| Highest quintile                                     | 170 (24.0)        | 175 (15.1)          | ***     | 17 (15.2) *                    | 30 (12.1) ***                 | 128 (16.0)***                      |
| 4th quintile                                         | 154 (21.7)        | 206 (17.8)          |         | 31 (27.7)                      | 31 (12.4)                     | 144 (18.1)                         |
| 3rd quintile                                         | 164 (23.1)        | 211 (18.2)          |         | 21 (18.7)                      | 42 (16.9)                     | 148 (18.6)                         |
| 2nd quintile                                         | 129 (18.2)        | 259 (22.3)          |         | 19 (17.0)                      | 65 (26.1)                     | 175 (21.9)                         |
| Lowest quintile                                      | 92 (13.0)         | 308 (26.6)          |         | 24 (21.4)                      | 81 (32.5)                     | 203 (25.4)                         |
| <b>Home ownership</b> <i>Missing=20</i>              |                   |                     |         |                                |                               |                                    |
| Own/mortgage                                         | 427 (53.6)        | 437 (31.1)          | ***     | 62 (45.3)                      | 49 (16.2) ***                 | 326 (33.7) ***                     |
| Rent                                                 | 297 (37.2)        | 740 (52.7)          |         | 57 (41.6)                      | 203 (67.2)                    | 480 (49.7)                         |
| Government/Boarding house                            | 73 (9.2)          | 228 (16.2)          |         | 18 (13.1)                      | 50 (16.6)                     | 160 (16.6)                         |
| <b>CHILD CHARACTERISTICS</b>                         | <b>808</b>        | <b>1437</b>         |         | <b>137</b>                     | <b>309</b>                    | <b>991</b>                         |
| <b>Gender</b> <i>Missing = 49</i>                    |                   |                     |         |                                |                               |                                    |
| Female                                               | 400 (50.1)        | 670 (48.0)          | ns      | 51 (37.5) **                   | 151 (49.7)                    | 468 (48.9)                         |
| Male                                                 | 399 (49.9)        | 727 (52.0)          |         | 85 (62.5)                      | 153 (50.3)                    | 489 (51.1)                         |

Maternal and Household N=2222; Children N=2245 (includes twins)

<sup>a</sup> Each Drop-out participant group compared to the complete participant group as the reference, using chi-squared test.

\*p<0.05 \*\* p<0.01 \*\*\*p <0.0001 ns= not significant

Table 2 Number of injuries, injury rates per 10 person-years (PYs) and Injury Rate Ratios (RRs) with 95% Confidence Intervals (CIs) for the child participants, stratified by follow-up status and types of attrition.

| Child Participants     | N (%)        | Sum Injuries | Injury Rates /10 PYs | Unadjusted RR (95% CI) <sup>a</sup> | Adjusted RR (95% CI) <sup>a,b</sup> |
|------------------------|--------------|--------------|----------------------|-------------------------------------|-------------------------------------|
| Total cohort           | 2245 (100.0) | 941          | 2.59                 | 0.99 (0.88-1.13)                    | 0.97 (0.85-1.10)                    |
| Complete follow-up     | 808 (36.0)   | 340          | 2.60                 | Reference                           | Reference                           |
| Incomplete follow-up   | 1437 (64.0)  | 601          | 2.58                 | 0.99 (0.87-1.13)                    | 0.95 (0.82-1.09)                    |
| Withdrawn              | 137 (6.1)    | 80           | 3.48                 | <b>1.32 (1.03-1.68) *</b>           | 1.24 (0.96-1.58)                    |
| Lost to follow-up      | 309 (13.8)   | 128          | 2.38                 | 0.89 (0.72-1.09)                    | 0.81 (0.65-1.01)                    |
| Partial/Non-responders | 991 (44.1)   | 393          | 2.51                 | 0.98 (0.85-1.13)                    | 0.94 (0.81-1.10)                    |

<sup>a</sup> Poisson regression, offset = log of length of follow-up time of child.

<sup>b</sup> Adjusted for maternal age, maternal education, maternal smoking status, number of children in household, family marital status, household income, housing status and child gender in two step model. Final model included maternal age, maternal education level and child gender

\*p<0.05

Table 3 Child injury rates per 10 person-years (PYs) for the total cohort and stratified by follow-up status and types of attrition for baseline maternal, household and child characteristics.

|                                                         | Total Cohort<br>/10 PYs | Follow-up           |                       | p-value | Attrition by type <sup>a</sup> |                                 |                                      |
|---------------------------------------------------------|-------------------------|---------------------|-----------------------|---------|--------------------------------|---------------------------------|--------------------------------------|
|                                                         |                         | Complete<br>/10 PYs | Incomplete<br>/10 PYs |         | Withdrawn<br>/10 PYs           | Lost to<br>Follow-up<br>/10 PYs | Partial/Non<br>Responders<br>/10 PYs |
| <b>MATERNAL CHARACTERISTICS</b>                         |                         |                     |                       |         |                                |                                 |                                      |
| <b>Maternal level of education</b> <i>Missing=12</i>    |                         |                     |                       |         |                                |                                 |                                      |
| Tertiary degree                                         | 2.03                    | 2.12                | 1.92                  | ns      | 3.06 *                         | 1.72                            | 1.74                                 |
| Secondary school or trade                               | 2.70                    | 2.84                | 2.62                  |         | 3.66                           | 2.28                            | 2.57                                 |
| Not complete school                                     | 2.73                    | 2.43                | 2.83                  |         | 3.23                           | 2.87                            | 2.77                                 |
| <b>Maternal age</b> <i>Missing=3</i>                    |                         |                     |                       |         |                                |                                 |                                      |
| 35+ years                                               | 2.02                    | 1.83                | 2.18                  | ns      | 2.83                           | 2.76                            | 1.91                                 |
| 30-34 years                                             | 2.67                    | 2.86                | 2.52                  |         | 3.93                           | 1.50                            | 2.55                                 |
| 25-29 years                                             | 2.27                    | 2.35                | 2.23                  |         | 2.93                           | 1.69                            | 2.27                                 |
| <25 years                                               | 3.27                    | 3.76                | 3.14                  |         | 4.12                           | 3.13                            | 3.04                                 |
| <b>Smoking during pregnancy</b> <i>Missing=9</i>        |                         |                     |                       |         |                                |                                 |                                      |
| No                                                      | 2.49                    | 2.48                | 2.50                  | ns      | 3.25 *                         | 2.55                            | 2.36                                 |
| Yes                                                     | 2.84                    | 3.10                | 2.75                  |         | 4.17                           | 2.15                            | 2.84                                 |
| <b>HOUSEHOLD CHARACTERISTICS</b>                        |                         |                     |                       |         |                                |                                 |                                      |
| <b>Marital status</b> <i>Missing=18</i>                 |                         |                     |                       |         |                                |                                 |                                      |
| Two parent family                                       | 2.45                    | 2.53                | 2.41                  | ns      | 3.36                           | 2.33                            | 2.30                                 |
| Sole parent family                                      | 3.44                    | 3.47                | 3.43                  |         | 3.90                           | 2.66                            | 3.64                                 |
| <b>Other children in household</b> <i>Missing=14</i>    |                         |                     |                       |         |                                |                                 |                                      |
| None                                                    | 2.70                    | 2.84                | 2.61                  | ns      | 3.09 *                         | 2.66                            | 2.51                                 |
| 1-2 children                                            | 2.52                    | 2.51                | 2.53                  |         | 3.50                           | 2.30                            | 2.46                                 |
| 3+ children                                             | 2.52                    | 1.99                | 2.68                  |         | 4.21                           | 2.17                            | 2.73                                 |
| <b>Household income</b> <sup>b</sup> <i>Missing=354</i> |                         |                     |                       |         |                                |                                 |                                      |
| Highest quintile                                        | 2.03                    | 2.42                | 1.67                  | ns      | 2.04                           | 1.52                            | 1.65                                 |
| 4th quintile                                            | 2.55                    | 2.93                | 2.27                  |         | 2.79                           | 1.95                            | 2.24                                 |
| 3rd quintile                                            | 2.45                    | 2.33                | 2.55                  |         | 3.57                           | 2.92                            | 2.27                                 |
| 2nd quintile                                            | 2.54                    | 2.32                | 2.65                  |         | 3.74                           | 2.32                            | 2.66                                 |
| Lowest quintile                                         | 2.92                    | 3.53                | 2.74                  |         | 3.15                           | 2.36                            | 2.85                                 |
| <b>Home ownership</b> <i>Missing=20</i>                 |                         |                     |                       |         |                                |                                 |                                      |
| Own/mortgage                                            | 2.41                    | 2.53                | 2.29                  | ns      | 3.68 *                         | 1.47                            | 2.16                                 |
| Rent                                                    | 2.46                    | 2.48                | 2.46                  |         | 2.54                           | 2.50                            | 2.43                                 |
| Government/Boarding house                               | 3.55                    | 3.39                | 3.60                  |         | 5.85                           | 2.93                            | 3.57                                 |
| <b>CHILD CHARACTERISTICS</b>                            |                         |                     |                       |         |                                |                                 |                                      |
| <b>Gender</b> <i>Missing = 49</i>                       |                         |                     |                       |         |                                |                                 |                                      |
| Female                                                  | 2.18                    | 2.21                | 2.16                  | ns      | 3.13 *                         | 1.89                            | 2.15                                 |
| Male                                                    | 3.00                    | 2.87                | 3.07                  |         | 3.74                           | 2.93                            | 2.99                                 |

Children N=2245 (includes twins)

<sup>a</sup> Each Drop-out participant group compared to the complete participant group as the reference, using univariate Poisson regression with time offset.

<sup>b</sup> Gross annual household incomes standardised in AUD\$2010 values

\*p<0.05 \*\* p<0.01 \*\*\*p <0.0001 ns=not significant

1  
2  
3  
4  
5  
6  
7  
8  
9  
10  
11  
12  
13  
14  
15  
16  
17  
18  
19  
20  
21  
22  
23  
24  
25  
26  
27  
28  
29  
30  
31  
32  
33  
34  
35  
36  
37  
38  
39  
40  
41  
42  
43  
44  
45  
46  
47  
48  
49  
50  
51  
52  
53  
54  
55  
56  
57  
58  
59  
60

For peer review only

## STROBE Statement—checklist of items that should be included in reports of observational studies

|                              | Item No | Recommendation                                                                                                                                                                                                                                                                                                                                                                                                                                                         | PAGE                                           |
|------------------------------|---------|------------------------------------------------------------------------------------------------------------------------------------------------------------------------------------------------------------------------------------------------------------------------------------------------------------------------------------------------------------------------------------------------------------------------------------------------------------------------|------------------------------------------------|
| <b>Title and abstract</b>    | 1       | (a) Indicate the study's design with a commonly used term in the title or the abstract                                                                                                                                                                                                                                                                                                                                                                                 | 1                                              |
|                              |         | (b) Provide in the abstract an informative and balanced summary of what was done and what was found                                                                                                                                                                                                                                                                                                                                                                    | 2                                              |
| <b>Introduction</b>          |         |                                                                                                                                                                                                                                                                                                                                                                                                                                                                        |                                                |
| Background/rationale         | 2       | Explain the scientific background and rationale for the investigation being reported                                                                                                                                                                                                                                                                                                                                                                                   | 4                                              |
| Objectives                   | 3       | State specific objectives, including any prespecified hypotheses                                                                                                                                                                                                                                                                                                                                                                                                       | 5                                              |
| <b>Methods</b>               |         |                                                                                                                                                                                                                                                                                                                                                                                                                                                                        |                                                |
| Study design                 | 4       | Present key elements of study design early in the paper                                                                                                                                                                                                                                                                                                                                                                                                                | 5                                              |
| Setting                      | 5       | Describe the setting, locations, and relevant dates, including periods of recruitment, exposure, follow-up, and data collection                                                                                                                                                                                                                                                                                                                                        | 5-6                                            |
| Participants                 | 6       | (a) <i>Cohort study</i> —Give the eligibility criteria, and the sources and methods of selection of participants. Describe methods of follow-up<br><i>Case-control study</i> —Give the eligibility criteria, and the sources and methods of case ascertainment and control selection. Give the rationale for the choice of cases and controls<br><i>Cross-sectional study</i> —Give the eligibility criteria, and the sources and methods of selection of participants | 5                                              |
|                              |         | (b) <i>Cohort study</i> —For matched studies, give matching criteria and number of exposed and unexposed<br><i>Case-control study</i> —For matched studies, give matching criteria and the number of controls per case                                                                                                                                                                                                                                                 | Na                                             |
| Variables                    | 7       | Clearly define all outcomes, exposures, predictors, potential confounders, and effect modifiers. Give diagnostic criteria, if applicable                                                                                                                                                                                                                                                                                                                               | 6-7                                            |
| Data sources/<br>measurement | 8*      | For each variable of interest, give sources of data and details of methods of assessment (measurement). Describe comparability of assessment methods if there is more than one group                                                                                                                                                                                                                                                                                   | 6-7                                            |
| Bias                         | 9       | Describe any efforts to address potential sources of bias                                                                                                                                                                                                                                                                                                                                                                                                              | <b>Paper about bias</b>                        |
| Study size                   | 10      | Explain how the study size was arrived at                                                                                                                                                                                                                                                                                                                                                                                                                              | 5                                              |
| Quantitative variables       | 11      | Explain how quantitative variables were handled in the analyses. If applicable, describe which groupings were chosen and why                                                                                                                                                                                                                                                                                                                                           | 8                                              |
| Statistical methods          | 12      | (a) Describe all statistical methods, including those used to control for confounding                                                                                                                                                                                                                                                                                                                                                                                  | 8-9                                            |
|                              |         | (b) Describe any methods used to examine subgroups and interactions                                                                                                                                                                                                                                                                                                                                                                                                    | 8-9                                            |
|                              |         | (c) Explain how missing data were addressed                                                                                                                                                                                                                                                                                                                                                                                                                            | 9                                              |
|                              |         | (d) <i>Cohort study</i> —If applicable, explain how loss to follow-up was addressed<br><i>Case-control study</i> —If applicable, explain how matching of cases and controls was addressed<br><i>Cross-sectional study</i> —If applicable, describe analytical methods taking account of sampling strategy                                                                                                                                                              | <b>Paper about bias from loss to follow-up</b> |
|                              |         | (e) Describe any sensitivity analyses                                                                                                                                                                                                                                                                                                                                                                                                                                  |                                                |

Continued on next page

1  
2  
3  
4  
5  
6  
7  
8  
9  
10  
11  
12  
13  
14  
15  
16  
17  
18  
19  
20  
21  
22  
23  
24  
25  
26  
27  
28  
29  
30  
31  
32  
33  
34  
35  
36  
37  
38  
39  
40  
41  
42  
43  
44  
45  
46  
47  
48  
49  
50  
51  
52  
53  
54  
55  
56  
57  
58  
59  
60**Results**

|                          |     |                                                                                                                                                                                                              |                 |
|--------------------------|-----|--------------------------------------------------------------------------------------------------------------------------------------------------------------------------------------------------------------|-----------------|
| Participants             | 13* | (a) Report numbers of individuals at each stage of study—eg numbers potentially eligible, examined for eligibility, confirmed eligible, included in the study, completing follow-up, and analysed            | Figure 1        |
|                          |     | (b) Give reasons for non-participation at each stage                                                                                                                                                         | Figure 1        |
|                          |     | (c) Consider use of a flow diagram                                                                                                                                                                           | Figure 1        |
| Descriptive data         | 14* | (a) Give characteristics of study participants (eg demographic, clinical, social) and information on exposures and potential confounders                                                                     | 9-10            |
|                          |     | (b) Indicate number of participants with missing data for each variable of interest                                                                                                                          | Table 1         |
|                          |     | (c) <i>Cohort study</i> —Summarise follow-up time (eg, average and total amount)                                                                                                                             | 9-10            |
| Outcome data             | 15* | <i>Cohort study</i> —Report numbers of outcome events or summary measures over time                                                                                                                          | Table 3         |
|                          |     | <i>Case-control study</i> —Report numbers in each exposure category, or summary measures of exposure                                                                                                         |                 |
|                          |     | <i>Cross-sectional study</i> —Report numbers of outcome events or summary measures                                                                                                                           |                 |
| Main results             | 16  | (a) Give unadjusted estimates and, if applicable, confounder-adjusted estimates and their precision (eg, 95% confidence interval). Make clear which confounders were adjusted for and why they were included | Table 2, page 9 |
|                          |     | (b) Report category boundaries when continuous variables were categorized                                                                                                                                    | Table 1         |
|                          |     | (c) If relevant, consider translating estimates of relative risk into absolute risk for a meaningful time period                                                                                             |                 |
| Other analyses           | 17  | Report other analyses done—eg analyses of subgroups and interactions, and sensitivity analyses                                                                                                               | 11              |
| <b>Discussion</b>        |     |                                                                                                                                                                                                              |                 |
| Key results              | 18  | Summarise key results with reference to study objectives                                                                                                                                                     | 11-12           |
| Limitations              | 19  | Discuss limitations of the study, taking into account sources of potential bias or imprecision. Discuss both direction and magnitude of any potential bias                                                   | 13              |
| Interpretation           | 20  | Give a cautious overall interpretation of results considering objectives, limitations, multiplicity of analyses, results from similar studies, and other relevant evidence                                   | 13              |
| Generalisability         | 21  | Discuss the generalisability (external validity) of the study results                                                                                                                                        | 13              |
| <b>Other information</b> |     |                                                                                                                                                                                                              |                 |
| Funding                  | 22  | Give the source of funding and the role of the funders for the present study and, if applicable, for the original study on which the present article is based                                                | 14              |

\*Give information separately for cases and controls in case-control studies and, if applicable, for exposed and unexposed groups in cohort and cross-sectional studies.

**Note:** An Explanation and Elaboration article discusses each checklist item and gives methodological background and published examples of transparent reporting. The STROBE checklist is best used in conjunction with this article (freely available on the Web sites of PLoS Medicine at <http://www.plosmedicine.org/>, Annals of Internal Medicine at <http://www.annals.org/>, and Epidemiology at <http://www.epidem.com/>). Information on the STROBE Initiative is available at [www.strobe-statement.org](http://www.strobe-statement.org).



# BMJ Open

## Impact of participant attrition on child injury outcome estimates: a longitudinal birth cohort study in Australia

|                                 |                                                                                                                                                                                                                                                                                                                                                                        |
|---------------------------------|------------------------------------------------------------------------------------------------------------------------------------------------------------------------------------------------------------------------------------------------------------------------------------------------------------------------------------------------------------------------|
| Journal:                        | <i>BMJ Open</i>                                                                                                                                                                                                                                                                                                                                                        |
| Manuscript ID                   | bmjopen-2016-015584.R1                                                                                                                                                                                                                                                                                                                                                 |
| Article Type:                   | Research                                                                                                                                                                                                                                                                                                                                                               |
| Date Submitted by the Author:   | 23-Mar-2017                                                                                                                                                                                                                                                                                                                                                            |
| Complete List of Authors:       | Cameron, Cate; Griffith University, Menzies Health Institute<br>Osborne, Jodie; Griffith University<br>Spinks, Annelies; CSIRO<br>Davey, TM; The University of Queensland<br>Sipe, Neil; University of Queensland, School of Geography, Planning and Environmental Management<br>McClure, Rod; Harvard School of Public Health, Harvard Injury Control Research Center |
| <b>Primary Subject Heading</b>: | Epidemiology                                                                                                                                                                                                                                                                                                                                                           |
| Secondary Subject Heading:      | Epidemiology, Research methods                                                                                                                                                                                                                                                                                                                                         |
| Keywords:                       | EPIDEMIOLOGY, STATISTICS & RESEARCH METHODS, PUBLIC HEALTH                                                                                                                                                                                                                                                                                                             |
|                                 |                                                                                                                                                                                                                                                                                                                                                                        |

SCHOLARONE™  
Manuscripts

Peer Review Only

1  
2  
3 **Impact of participant attrition on child injury outcome estimates: a**  
4 **longitudinal birth cohort study in Australia**  
5  
6  
7  
8  
9

10 **Type of Manuscript:** Original Article  
11

12 **Authors:** Cate M. Cameron,<sup>a</sup> Jodie M. Osborne,<sup>a</sup> Anneliese B. Spinks,<sup>b,c</sup> Tamzyn M. Davey,<sup>d</sup> Neil  
13 Sipe,<sup>e</sup> Roderick J. McClure.<sup>f</sup>  
14  
15  
16  
17  
18  
19

20 **Addresses:**

21 <sup>a</sup> Menzies Health Institute Queensland, Griffith University, Meadowbrook, Australia.

22 <sup>b</sup> Commonwealth Scientific and Industrial Research Organisation (CSIRO), Dutton Park, Australia.

23 <sup>c</sup> School of Medicine, Griffith University, Meadowbrook, Australia.

24 <sup>d</sup> The University of Queensland, School of Public Health, Herston, Australia.

25 <sup>e</sup> School of Geography, Planning and Environmental Management, The University of Queensland, St  
26 Lucia, Australia.

27 <sup>f</sup> Harvard Injury Control Research Center, Harvard School of Public Health, Boston, USA.  
28  
29  
30

31 **Corresponding Author:** Dr Cate Cameron, Menzies Health Institute Queensland, Griffith  
32 University, University Drive, Meadowbrook, Australia, 4131. Email: [cate.cameron@griffith.edu.au](mailto:cate.cameron@griffith.edu.au),  
33 Telephone (07) 338 21289, Facsimile (07) 338 21414.  
34  
35  
36  
37  
38

39 **Word Count:** Abstract: 248 words; Text: 2993  
40  
41  
42  
43

44 **Authorship contributions:** CMC, JMO, ABS, TMD, NS, RJM were involved in study concept and  
45 design. JMO and CMC acquired the data. CMC conducted the data management and analysis.  
46 CMC, JMO and RJM were all involved in interpretation of data wrote the first draft of the manuscript.  
47 CMC, JMO, ABS, TMD, NS, RJM contributed to the critical revision of the manuscript and approved  
48 the final version.  
49  
50  
51  
52  
53

54 **KEY WORDS**

55  
56 Attrition, child injury, epidemiology, longitudinal research, data linkage, methods  
57  
58  
59  
60

## ABSTRACT

### Background

Longitudinal research is subject to participant attrition. Systemic differences between retained participants and those lost to attrition potentially bias prevalence of outcomes, as well as exposure-outcome associations. This study examines the impact of attrition on the prevalence of child injury outcomes and the association between sociodemographic factors and child injury.

### Methods

Participants were recruited as part of the Environments for Healthy Living (EFHL) birth cohort study. Baseline data were drawn from maternal surveys. Child injury outcome data were extracted from hospital records, 2006-2013. Participant attrition status was assessed up to 2014. Rates of injury related episodes of care were calculated, taking into account exposure time and Poisson regression was performed to estimate exposure-outcome associations.

### Results

Of the 2222 participating families, 799 families (36.0%) had complete follow up data. Those with incomplete data included 137 (6.2%) who withdrew, 308 (13.8%) were lost to follow up and 978 families (44.0%) who were partial/non-responders. Families of lower socio-economic status were less likely to have complete follow up data ( $p < 0.05$ ). Systematic differences in attrition did not result in differential child injury outcomes or significant differences between the attrition and non-attrition groups in risk factor effect estimates. Participants who withdrew were the only group to demonstrate differences in child injury outcomes.

### Conclusion

This research suggests that even with considerable attrition, if the proportion of participants who withdraw is minimal, overall attrition is unlikely to affect the population prevalence estimate of child injury or measures of association between sociodemographic factors and child injury.

**STRENGTHS AND LIMITATIONS OF THIS STUDY**

- Uses a mixed active-passive cohort design from a birth cohort study that employed both data linkage and direct participant follow-up to ascertain comprehensive exposure and outcome data.
- Ability to examine impact of participant attrition on outcome estimates using complete data.
- Relatively small sample size. The adjusted model removed significance even though there was little change in the point estimate and could represent a type 2 error.

## INTRODUCTION

Longitudinal birth cohort studies are invaluable for exploring the impact of early environments (physical, social and economic) on a child's ongoing health and development.<sup>1</sup> One of the greatest threats to the validity of this research design is bias due to participant attrition.<sup>2</sup> Attrition can occur as a result of a participant actively withdrawing from the study, relocating and becoming lost to follow up or not responding to follow up waves.

Research examining attrition in longitudinal studies has identified systemic differences between responders and non-responders across a range of individual, family, social, demographic and health characteristics, with disadvantaged populations generally having higher rates of attrition.<sup>3-8</sup> Systemic characteristic differences have also been found between participant groups according to the reason for attrition.<sup>6,9,10</sup> In line with epidemiological principles, it is anticipated that these differences will result in a bias of outcome prevalence and exposure-outcome associations. However, whilst evidence of a link between attrition and prevalence bias has been reported in the literature, there is less evidence of attrition leading to bias in exposure-outcome associations, and the bias effect can vary depending on the nature of the outcomes under investigation.<sup>3-5,7,11</sup>

Within the context of longitudinal birth studies, the impact that attrition bias has on child injury outcomes is an important area for further research. To date, the majority of attrition-injury studies have focused on participants recruited after injury has already occurred, or older populations.<sup>12-22</sup> In these studies, attrition has been linked to socio-economic and participant characteristics, causes of injury, injury severity and treatment plans. Extending this research to include longitudinal research on outcomes for young children in a broader population will greatly enhance our understanding of this relationship.

Using data linkage of routinely collected administrative health records with participant survey data, provides researchers new opportunities to assess the impact of attrition bias on participant outcomes in prospective longitudinal studies.<sup>23</sup> Data linkage can provide comprehensive access to outcomes

1  
2  
3 data for the total cohort group, allowing comparisons of outcomes to be made between participants  
4 who are active and those who have been lost from 'active' (survey) follow up.  
5  
6

7  
8 In this manuscript we report the use of a mixed direct participant contact (including surveys) and  
9 linked data design in a longitudinal birth cohort study to examine the impact of participant attrition  
10 bias on child injury outcome estimates. In particular, the research will i) identify whether there are  
11 systematic differences in attrition, and ii) examine the impact of attrition on both the prevalence of  
12 child injury outcomes and the association between sociodemographic variables and child injury.  
13  
14  
15  
16  
17

## 18 **METHODS**

### 19 **Study Design**

20  
21 This cohort study combined survey and linked administrative health data.  
22  
23

### 24 **Environments for Healthy Living (EFHL): Griffith Birth Cohort Study**

25  
26  
27 The EFHL study is a longitudinal birth cohort which investigates how social, environmental,  
28 neighbourhood, family, maternal and individual factors impact a child's health and development.<sup>24</sup>  
29  
30 Pregnant women in their third trimester were recruited between 2006 and 2011 at one of three public  
31 maternity hospitals in South East Queensland and Northern New South Wales. Participants completed  
32 a questionnaire at baseline and then follow-up surveys were sent 1, 3 and 5 years after the birth of the  
33 child. In between these scheduled contacts, regular newsletters were sent and additional sub-study  
34 project contacts occurred. Returned mail or contact difficulties triggered the use of alternative contact  
35 mechanisms supplied at enrolment and updated at follow-ups, including a relative or friends contact  
36 details, email and Facebook.<sup>24 25</sup> The EFHL sample was largely characteristic of births in the region,  
37 however, consistent with the public hospital setting from which participants were recruited, there was  
38 a higher than national average representation of families with lower incomes, younger maternal age,  
39 more overseas born parents and higher proportions of maternal smoking in pregnancy.<sup>25</sup> The study  
40 methodology and baseline characteristics of the sample have been comprehensively described in other  
41  
42  
43  
44  
45  
46  
47  
48  
49  
50  
51  
52  
53  
54  
55  
56  
57  
58  
59  
60

1  
2  
3 papers.<sup>24 25</sup> EFHL has been included on the Australian and New Zealand Clinical Trials Registry  
4  
5 (ACTRN12310000931077).  
6  
7

### 8 **Participants**

9  
10 Participants were families enrolled in the EFHL project at one of the two Queensland based public  
11 hospitals in the region (Logan or Gold Coast Hospital). This allowed direct comparison to Queensland  
12 Health child hospital records. Participants were selected from those recruited in the years 2006 to  
13 2010 only, as these cohorts had completed more than one follow up survey. Cases of maternal and  
14 child death were excluded from the analysis as these participants had died (which is a known  
15 outcome) and were not lost to follow up.  
16  
17  
18  
19  
20  
21  
22

### 23 **Ethical considerations**

24  
25 Ethics approval was provided by the participating hospitals and by the Human Research Ethics  
26 Committees of Griffith University and the University of Queensland.  
27  
28  
29  
30

### 31 **Data sharing**

32  
33 No additional data available.  
34  
35  
36

### 37 **Participant consent**

38  
39 Written, informed maternal consent for data used in this analysis was obtained for (1) direct  
40 participant contact including the completion of baseline and follow up surveys; (2) release of hospital  
41 perinatal records and (3) for data to be linked to the child's administrative health records including  
42 hospital admission and emergency department presentations.  
43  
44  
45  
46  
47  
48

### 49 **Data Sources and Collection**

#### 50 *Baseline Social, Maternal and Household Variables*

51  
52  
53  
54 Baseline information was collected from hospital perinatal records and from a self-administered  
55 survey completed by mothers during pregnancy. This baseline survey covered a range of maternal,  
56  
57  
58  
59  
60

1  
2  
3 household and community factors. The child characteristics included in this analysis were gender and  
4 age, via length of follow-up. Maternal characteristics included the level of education completed;  
5 maternal age at baseline and whether the mother smoked during her pregnancy. Household factors  
6 included marital status, whether other children resided in the home, housing status (owned, rented,  
7 government/boarding house) and household income level. Household income was divided into  
8 quintiles.<sup>25</sup>

#### 15 16 *Cohort Attrition Status*

17  
18 Information on participant attrition status was collected from the EFHL participant tracking database.  
19 Records were kept on both the participant's overall recruitment status, as well as on their participation  
20 in follow up surveys up to May 2014.

21  
22 Participants were categorised into two groups; (1) those with complete follow-up or (2) those with  
23 incomplete follow-up. Participants with complete follow-up included those that had returned all  
24 follow-up surveys relevant to their age group and who had not withdrawn during the lifetime of the  
25 project.

26  
27 Participants with incomplete follow-up were categorised into one of three groups. (1) The  
28 "withdrawn" group included any participant who had actively asked to be withdrawn from direct  
29 participant contact and ongoing survey completion. Consent was retained for the use of existing data  
30 and linked administrative data. (2) "Lost to follow-up", included those participants who did not  
31 respond to follow-up surveys and who could no longer be contacted through their home address,  
32 phone, email or emergency contact addresses. (3) "Partial or Non Responders" included people who  
33 were locatable, had not withdrawn, but had not completed one or more follow up surveys beyond the  
34 initial baseline survey.

#### 35 36 37 38 39 40 41 42 43 44 45 46 47 48 49 50 51 52 *Administrative Health Data*

53  
54 The child's health records were extracted between 2006 and 2013 from the Queensland Emergency  
55 Department Information System (EDIS) and from the Queensland Hospital Admitted Patients Data  
56  
57  
58  
59  
60



1  
2  
3 Collection (QHAPDC). The matching procedure was undertaken by the Queensland Department of  
4 Health (the custodians of the data) using linkage software, based on deterministic and probabilistic  
5 methods, to link demographic, child and maternal information to hospital records. Deterministic  
6 linkage involves the linking of data sets through comparing fields such as name, year of birth and  
7 street name with the requirement that the records agree on all characters. Probabilistic linkage  
8 involves the use of statistical models and algorithms to estimate the probability of data from different  
9 data sets having commonality (e.g. the same person/event). Clerical reviews of the data were  
10 undertaken to manually inspect uncertain matches in probabilistic linkage.<sup>26</sup>  
11  
12  
13  
14  
15  
16  
17  
18  
19

## 20 **Outcome Measure**

21  
22 Injury related to a hospital or Emergency Department (ED) episode of care was the outcome of  
23 interest. Multiple admissions, nested admissions and any corresponding hospital or ED presentations  
24 relating to the one injury event were identified through dates of presentations, transfer codes  
25 combined with diagnostic fields. These records were subsequently collapsed into one episode of care  
26 for the injury event.  
27  
28  
29  
30  
31  
32

## 33 *Injury Classification*

34  
35 Injury presentations were classified using ICD-10-AM, Chapter 19 Injury and Poisonings (S00-T98)  
36 and Chapter 20 External Causes (U50-Y98), with late effects from injury excluded. EDIS data  
37 contains only a single diagnostic field in which to describe the reason for presentation, whereas  
38 QHAPDC contains a primary diagnosis field and multiple other diagnostic fields in which external  
39 causes and activity codes may be recorded. Researchers checked text descriptions in the EDIS data to  
40 identify any injuries that were not captured in the single diagnosis field. Almost all ED records used  
41 the one available diagnostic field to classify the nature of the injury (S00-T98). External cause codes  
42 (V01-Y98) were used in less than 5% of ED records. As a result, injury cause codes were only  
43 available comprehensively for the inpatient episodes of care. Injury subgroups were defined and  
44 matched to the ICD-10-AM chapter subcategories.  
45  
46  
47  
48  
49  
50  
51  
52  
53  
54  
55  
56

## 57 *Calculation of Person Years*

1  
2  
3 The ages of the children and length of follow up for injury related hospital treatment varied  
4 considerably across participants due to the 5 recruitment waves. As such, individual person-years  
5 (PYs) of exposure time were calculated for each child, based on the time between birth and 31  
6  
7 December 2013 in which he or she was residing in the state of Queensland, alive and eligible for  
8  
9 health care.  
10  
11

### 12 13 **Analysis**

14  
15 Data cleaning and analyses were undertaken using SAS 9.4 software. The statistical significance of  
16  
17 differences between groups was assessed by Pearson's chi-squared test for categorical data. Using the  
18  
19 state-wide linked administrative health data, injury related episodes of care were obtained for all  
20  
21 cohort participants. Rates of injury related episodes of care were calculated, taking into account PYs  
22  
23 exposure time, for each factor and by attrition status (rates/10PYs).  
24  
25

26  
27 Poisson regression was performed to estimate crude and adjusted rate ratios (RRs) between multiple  
28  
29 exposure factors (child, maternal and household characteristics) and the outcome (count of child  
30  
31 injury related episodes of care). All factors significant in the univariate analyses associated with injury  
32  
33 were included in the model. The log of individual PYs of exposure time was included as an offset.  
34  
35 The final model included child gender, maternal age and maternal education. Complete case analysis  
36  
37 was employed with two-sided significance set at a level of 5%.  
38  
39  
40

### 41 **RESULTS**

42  
43 In total, 2222 families who enrolled in the EFHL study from 2006-2010, at the two participating  
44  
45 Queensland hospitals, were included in this analysis. The number of children totalled 2245 (including  
46  
47 23 sets of twins). Maternal age ranged from 16 to 48 years with a mean age of 28.9 years (SD± 5.98).  
48  
49 At the time of enrolment, 14.1% of the households were sole parent families, 28.2% of maternal  
50  
51 participants smoked cigarettes, 34.9% had no other children living in the household and 22.7% of the  
52  
53 maternal participants had not completed secondary school.  
54  
55  
56  
57  
58  
59  
60

### Attrition Status and Follow-up

Of the 2222 participating families, 799 families (36.0%) had complete follow-up, 137 (6.2%) were withdrawn, 308 (13.8%) were lost to follow-up and 978 families (44.0%) were partial or non-responders (Figure 1). There was no significant difference in the proportion of households with complete or incomplete follow-up across the 5 recruitment waves ( $p=0.20$ ).

*Insert Figure 1 about here.*

Follow-up consisted of a total of 11,908.3 PYs from birth to seven years of age, with a mean 5.3 PYs per child (range 0-7). Automated linkage and manual searching by the state health department data linkage unit found records in QHAPDC for 97.1% of the child participants ( $n=2245$ ), including their birth record.

### Baseline Demographic, Household and Child Characteristics by Attrition Status

Baseline demographic and household characteristics differed significantly between participants who had complete follow up compared to those families who had incomplete follow up. Attrition families were more likely to have lower levels of maternal education, lower maternal age, have higher rates of maternal smoking, be single parent households, have more children residing in the home, have lower gross household incomes and live in rental or government boarding housing (all  $p<0.0001$ ). However there were no differences in the proportion of child gender for active families compared to attrition families (Table 1).

*Insert Table 1 about here.*

These baseline characteristic differences were similar for two of the three attrition groups, lost to follow-up and partial/non-responders. However, those families in the withdrawn group were more similar in baseline characteristics to the families in the complete follow up group, with the exception of maternal age, marital status and gross household income (Table 1). Of note, families in the withdrawn group were more likely to have male children than those families who fully participated ( $p<0.01$ )

### Prevalence Rates of Childhood Injury by Attrition Status

The total cohort had an overall child injury rate of 2.59/10PYs, similar to the child injury rate for those families with complete follow up (2.60/10PYs) and those families who were lost to follow-up or partial/non-responders (Table 2). However, families in the withdrawn group had significantly higher rates of child injury compared to families with complete follow up with an unadjusted RR=1.32 (95% CI 1.03-1.68). While there was little reduction in the effect size after adjusting for co-variates, the difference in child injury rates for families who withdrew compared to families with complete follow up was no longer statistically significant, with an adjusted RR=1.24 (95% CI 0.96-1.58). (Table 2).

*Insert Table 2 about here.*

### Relationship between Baseline Sociodemographic Variables (exposure) and Child Injury Episodes (outcome) by Attrition Status

For the total cohort, rates of child injury increased as the level of maternal education, maternal age and gross household income decreased (Table 3). Rates of child injury were higher in single parent households, families living in government or boarding house accommodation and for families with male children. This distribution was similarly reflected in both the families with complete follow up and those lost to attrition, with no statistically significant differences in the demographically stratified rates of child injury when comparing overall attrition status ( $p>0.05$ ) (Table 3).

*Insert Table 3 about here.*

While the direction of the demographically stratified child injury rates was similar for all attrition groups, the magnitude of this difference was greater in the withdrawn group for a number of baseline factors. Child injury rates for families that withdrew were higher than families with complete follow up for all baseline factors, but most pronounced with respect to child gender, maternal education, maternal smoking, number of children living in the household and home ownership ( $p<0.05$ ).

## DISCUSSION

This study examined the impact of attrition in child injury research on the prevalence of child injury outcomes and the association between sociodemographic variables and injury (exposure-outcome relationship). There were three key findings. First, participants with incomplete follow up, as a group, differed from complete responders across most sociodemographic characteristics and there were also differences in these characteristics across attrition types (within the incomplete follow up group). Second, despite these systematic differences, there were no statistically significant impacts on the overall injury prevalence estimates and risk factor effect estimates, with the exception of the withdrawn group. The withdrawn group differed least, however, from the complete group in sociodemographic characteristics. Third, despite these systemic differences, the direction and nature of the sociodemographic-child injury relationship did not vary across the attrition groups.

The finding that there were systemic differences in the baseline social, maternal, and household characteristics of those with complete follow up versus those lost to attrition is consistent with previous research in this area, with families categorised as having lower socioeconomic status less likely to remain as active participants in the study.<sup>3 5 9 10</sup> Systematic differences in attrition were also evident across attrition groups, as has been demonstrated in previous research.<sup>9 10</sup> Interestingly, whilst families from the 'lost to follow up' and 'partial/non responder' groups were more likely to be of lower socioeconomic status, our withdrawn participants were more similar in their baseline characteristics to participants with complete follow up. It may be that families of higher sociodemographic status felt more confident to actively withdraw from this research or that there are unmeasured characteristics in these families that lead to higher rates of withdrawal. Further research is warranted given the relatively small sample size of this withdrawn group.

Consistent with previous research,<sup>3 4 27</sup> it was anticipated that systemic differences in attrition would result in differences in the prevalence of child injury outcomes across our groups (attrition-child injury), particularly as the relationship between lower sociodemographic factors and child injury has been well documented in the literature.<sup>28-31</sup> However, there were no statistically significant impacts of

1  
2  
3 this differential attrition on the overall injury prevalence estimates and risk factor effect estimates.  
4  
5 The only apparent suggestion of difference (albeit with the observed stable effect losing significance  
6  
7 with inclusion of multiple variables in the model) was in the withdrawn group, despite this group  
8  
9 differing least from the “complete follow up” group for all measures of SES, compared to the other  
10  
11 attrition categories. It should be noted though that the withdrawn group was small in absolute terms  
12  
13 (i.e. <5% of the total cohort) and had the group been larger, it could have impacted on the overall  
14  
15 prevalence of the outcome. This suggests that reasons for attrition may need to be examined in  
16  
17 epidemiological research, as a high proportion of withdrawals may indicate the potential for bias.  
18  
19

20  
21 Importantly, the systemic differences in attrition also had little impact on the direction of the  
22  
23 relationship between sociodemographic factors and child injury, with lower socioeconomic status  
24  
25 families having higher rates of injury across all the attrition groups. This finding adds to a growing  
26  
27 body of evidence indicating that selective attrition does not necessarily impact the relationship  
28  
29 between a range of exposure-outcome measures.<sup>3 4 10</sup> With follow up rates for cohort studies regularly  
30  
31 being reported in the 30-70% range,<sup>32</sup> it is promising that these results suggest exposure-outcome  
32  
33 findings from studies with large amounts of attrition may not need to be interpreted with the degree of  
34  
35 caution currently applied.  
36

37  
38 A key strength of this study was the mixed active-passive nature of the cohort design. Prior to the first  
39  
40 published results from this study, there had been few birth cohort studies that employed data linkage  
41  
42 methodology in combination with active participant contact (survey follow up) to ascertain  
43  
44 comprehensive exposure and outcome data. Thus, this is one of the few studies capable of examining  
45  
46 with rigour the questions we have addressed in this research. The key limitation is the relatively small  
47  
48 sample size. This was particularly evident in relation to our main finding that it was in the group of  
49  
50 participants who withdrew from the study that we found a bias. The adjusted model removed  
51  
52 significance of the main finding even though there was little change in the point estimate (from 1.32  
53  
54 to 1.24) and could represent a type 2 error. The second limitation relates to the nature of the study  
55  
56 sample, the determinant variables measured, the injury outcome focus of the analysis and the follow  
57  
58 up protocols used. While the research results could be expected to apply to similar circumstances, it is  
59  
60

1  
2  
3 unknown how validly the study findings should be applied beyond the study group we examined. It is  
4 possible that in studies with a demanding follow up protocol, participant attrition may be higher in  
5 people whose determinant variables are already affecting outcomes, and hence in these studies  
6 attrition may be more likely to be associated with a biased effect estimate.  
7  
8  
9

10  
11  
12 The findings of this research provide support for relaxing one of the most challenging expectations of  
13 epidemiological studies; that is, complete participant follow up. Even with considerable attrition,  
14 when proportions of participants who withdraw from the study are low, attrition bias is unlikely to  
15 affect either the population prevalence estimate or measures of association with key study variables.  
16  
17  
18  
19

## 20 21 22 **ACKNOWLEDGMENTS**

23  
24 The research reported in this publication is part of the Environments for Healthy Living (EFHL):  
25 Griffith Study of Population Health (Australian and New Zealand Clinical Trials Registry:  
26 ACTRN12610000931077). The EFHL project was conceived by Professor Rod McClure, Dr Cate  
27 Cameron, Professor Judy Searle and Professor Ronan Lyons. We are thankful for the contributions of  
28 the Project Manager, Rani Scott, and the current and past Database Managers. We gratefully  
29 acknowledge the administrative staff, research staff, and the hospital antenatal and birth suite  
30 midwives of the participating hospitals for their valuable contributions to the study, in addition to the  
31 expert advice provided by Research Investigators throughout the project.  
32  
33  
34  
35  
36  
37  
38  
39  
40

## 41 42 **FUNDING**

43  
44 This study was funded by an Australian Research Council Discovery Grant [DP110105423]. Core  
45 funding to support EFHL is provided by Griffith University. Dr Cameron was supported by a Public  
46 Health Fellowship (ID 428254) from the NHMRC.  
47  
48  
49  
50

## 51 52 **COMPETING INTERESTS**

53  
54 The authors do not have any competing interests in relation to this research.  
55  
56  
57  
58  
59  
60



## REFERENCES

1. Western M, Haynes M, Baffour B, et al. The Case for a New Australian Birth Cohort Study: Institute for Social Science Research, University of Queensland 2015.
2. Ahern K, Le Brocq R. Methodological Issues in the Effects of Attrition: Simple Solutions for Social Scientists. *Field Methods* 2005;17(1):53-69.
3. Wolke D, Waylen A, Samara M, et al. Selective drop-out in longitudinal studies and non-biased prediction of behaviour disorders. *The British journal of psychiatry : the journal of mental science* 2009;195(3):249-56. doi: 10.1192/bjp.bp.108.053751 [published Online First: 2009/09/02]
4. Osler M, Kriebbaum M, Christensen U, et al. Loss to follow up did not bias associations between early life factors and adult depression. *J Clin Epidemiol* 2008;61(9):958-63. doi: 10.1016/j.jclinepi.2007.11.005 [published Online First: 2008/05/23]
5. Greene N, Greenland S, Olsen J, et al. Estimating bias from loss to follow-up in the Danish National Birth Cohort. *Epidemiology* 2011;22(6):815-22. doi: 10.1097/EDE.0b013e31822939fd [published Online First: 2011/09/16]
6. Ng SK, Scott R, Scuffham PA. Contactable Non-responders Show Different Characteristics Compared to Lost to Follow-Up Participants: Insights from an Australian Longitudinal Birth Cohort Study. *Matern Child Health J* 2016;20(7):1472-84.
7. Howe LD, Tilling K, Galobardes B, et al. Loss to follow-up in cohort studies: bias in estimates of socioeconomic inequalities. *Epidemiology* 2013;24(1):1-9. doi: 10.1097/EDE.0b013e31827623b1 [published Online First: 2012/12/06]
8. Aylward GP, Hatcher RP, Stripp B, et al. Who goes and who stays: subject loss in a multicenter, longitudinal follow-up study. *J Dev Behav Pediatr* 1985;6(1):3-8.
9. Young AF, Powers JR, Bell SL. Attrition in longitudinal studies: who do you lose? *Aust N Z J Public Health* 2006;30(4):353-61. [published Online First: 2006/09/08]
10. Powers J, Tavener M, Graves A, et al. Loss to follow-up was used to estimate bias in a longitudinal study: a new approach. *J Clin Epidemiol* 2015;68(8):870-6. doi: 10.1016/j.jclinepi.2015.01.010 [published Online First: 2015/02/24]
11. Cornish R, Tilling K, Boyd A, et al. Using linkage to electronic primary care records to evaluate recruitment and nonresponse bias in the Avon Longitudinal Study of Parents and Children. *Epidemiology* 2015;26(4):e41-2. doi: 10.1097/EDE.0000000000000288 [published Online First: 2015/04/04]
12. Jourdan C, Bayen E, Bahrami S, et al. Loss to follow-up and social background in an inception cohort of patients with severe traumatic brain injury: results from the Paris-TBI study. *The Journal of head trauma rehabilitation* 2016;31(3):E42-E48.
13. Tin Tin S, Woodward A, Ameratunga S. Estimating bias from loss to follow-up in a prospective cohort study of bicycle crash injuries. *Inj Prev* 2014;20(5):322-9. doi: 10.1136/injuryprev-2013-040997
14. Holavanahalli RK, Lezotte DC, Hayes MP, et al. Profile of patients lost to follow-up in the Burn Injury Rehabilitation Model Systems' longitudinal database. *J Burn Care Res* 2006;27(5):703-12. doi: 10.1097/01.BCR.0000238085.87863.81
15. Blaha RZ, Arnett AB, Kirkwood MW, et al. Factors influencing attrition in a multisite, randomized, clinical trial following traumatic brain injury in adolescence. *J Head Trauma Rehabil* 2015;30(3):E33-40. doi: 10.1097/HTR.000000000000059
16. Corrigan JD, Harrison-Felix C, Bogner J, et al. Systematic bias in traumatic brain injury outcome studies because of loss to follow-up. *Arch Phys Med Rehabil* 2003;84(2):153-60. doi: 10.1053/apmr.2003.50093
17. Gabbe BJ, Cleland H, Watterson DM, et al. Long term outcomes data for the Burns Registry of Australia and New Zealand: Is it feasible? *Burns : journal of the International Society for Burn Injuries* 2015;41(8):1732-40. doi: 10.1016/j.burns.2015.09.005



18. Wade SL, Gerry Taylor H, Yeates KO, et al. Long-term parental and family adaptation following pediatric brain injury. *Journal of pediatric psychology* 2006;31(10):1072-83. doi: 10.1093/jpepsy/jsj077
19. Krellman JW, Kolakowsky-Hayner SA, Spielman L, et al. Predictors of follow-up completeness in longitudinal research on traumatic brain injury: findings from the National Institute on Disability and Rehabilitation Research traumatic brain injury model systems program. *Arch Phys Med Rehabil* 2014;95(4):633-41. doi: 10.1016/j.apmr.2013.10.016
20. de Groot S, Haisma JA, Post MW, et al. Investigation of bias due to loss of participants in a Dutch multicentre prospective spinal cord injury cohort study. *J Rehabil Med* 2009;41(5):382-9. doi: 10.2340/16501977-0346
21. Neuner B, Fleming M, Born R, et al. Predictors of loss to follow-up in young patients with minor trauma after screening and written intervention for alcohol in an urban emergency department. *Journal of studies on alcohol and drugs* 2007;68(1):133-40.
22. Lin C-YA, DeMatteo CA. The Challenges of Loss to Follow-up in Longitudinal Pediatric Acquired Brain Injury Research: One Research Team's Experiences. 2013
23. Calderwood L, Lessof C. Enhancing longitudinal surveys by linking to administrative data. *Methodology of longitudinal surveys* 2009:55-72.
24. Cameron CM, Scuffham PA, Spinks A, et al. Environments for Healthy Living (EFHL) Griffith birth cohort study: background and methods. *Matern Child Health J* 2012;16(9):1896-905. doi: 10.1007/s10995-011-0940-4 [published Online First: 2012/02/09]
25. Cameron CM, Scuffham PA, Shibl R, et al. Environments For Healthy Living (EFHL) Griffith birth cohort study: characteristics of sample and profile of antenatal exposures. *BMC Public Health* 2012;12:1080. doi: 10.1186/1471-2458-12-1080 [published Online First: 2012/12/18]
26. State of Queensland (Queensland Health). Queensland Data Linkage Framework. Brisbane, 2016.
27. Mars B, Cornish R, Heron J, et al. Using Data Linkage to Investigate Inconsistent Reporting of Self-Harm and Questionnaire Non-Response. *Archives of suicide research : official journal of the International Academy for Suicide Research* 2016;20(2):113-41. doi: 10.1080/13811118.2015.1033121 [published Online First: 2016/01/21]
28. Hong J, Lee B, Ha EH, et al. Parental socioeconomic status and unintentional injury deaths in early childhood: consideration of injury mechanisms, age at death, and gender. *Accident; analysis and prevention* 2010;42(1):313-9. doi: 10.1016/j.aap.2009.08.010 [published Online First: 2009/11/06]
29. Kim M-H, Subramanian SV, Kawachi I, et al. Association between childhood fatal injuries and socioeconomic position at individual and area levels: a multilevel study. *J Epidemiol Community Health* 2007;61:135-40. doi: doi:10.1136/jech.2006.047738
30. Laursen B, Nielsen JW. Influence of sociodemographic factors on the risk of unintentional childhood home injuries. *European journal of public health* 2008;18(4):366-70. doi: 10.1093/eurpub/ckn034 [published Online First: 2008/06/03]
31. Myhre MC, Thoresen S, Groggaard JB, et al. Familial factors and child characteristics as predictors of injuries in toddlers: a prospective cohort study. *BMJ open* 2012;2(2):e000740. doi: 10.1136/bmjopen-2011-000740 [published Online First: 2012/03/10]
32. Gustavson K, von Soest T, Karevold E, et al. Attrition and generalizability in longitudinal studies: findings from a 15-year population-based study and a Monte Carlo simulation study. *BMC public health* 2012;12:918. doi: 10.1186/1471-2458-12-918

1  
2  
3  
4  
5  
6  
7  
8  
9  
10  
11  
12  
13  
14  
15  
16  
17  
18  
19  
20  
21  
22  
23  
24  
25  
26  
27  
28  
29  
30  
31  
32  
33  
34  
35  
36  
37  
38  
39  
40  
41  
42  
43  
44  
45  
46  
47  
48  
49  
50  
51  
52  
53  
54  
55  
56  
57  
58  
59  
60

Figure 1 Flow diagram of EFHL cohort attrition status, Queensland participants 2006-2010 (N=2222 Households and N=2245 Children).

[attached file]

For peer review only

Table 1 Distribution of baseline maternal, household and child characteristics, stratified by follow-up status and types of attrition.

|                                                      | Follow-up         |                     |         | Attrition by type <sup>a</sup> |                               |                                    |
|------------------------------------------------------|-------------------|---------------------|---------|--------------------------------|-------------------------------|------------------------------------|
|                                                      | Complete<br>N (%) | Incomplete<br>N (%) | p-value | Withdrawn<br>N (%)             | Lost to<br>Follow-up<br>N (%) | Partial/Non<br>Responders<br>N (%) |
| <b>MATERNAL CHARACTERISTICS</b>                      | <b>799</b>        | <b>1423</b>         |         | <b>137</b>                     | <b>308</b>                    | <b>978</b>                         |
| <b>Maternal level of education</b> <i>Missing=12</i> |                   |                     |         |                                |                               |                                    |
| Tertiary degree                                      | 192 (24.1)        | 178 (12.6)          | ***     | 24 (17.5)                      | 34 (11.0) ***                 | 120 (12.4) ***                     |
| Secondary school or trade                            | 490 (61.6)        | 849 (60.0)          |         | 89 (65.0)                      | 182 (59.3)                    | 578 (59.6)                         |
| Not complete school                                  | 114 (14.3)        | 387 (27.4)          |         | 24 (17.5)                      | 91 (29.6)                     | 272 (28.0)                         |
| <b>Maternal age</b> <i>Missing=3</i>                 |                   |                     |         |                                |                               |                                    |
| 35+ years                                            | 201 (25.2)        | 228 (16.1)          | ***     | 17 (12.4) ***                  | 53 (17.2) ***                 | 158 (16.2) ***                     |
| 30-34 years                                          | 253 (31.7)        | 308 (21.7)          |         | 37 (27.0)                      | 56 (18.2)                     | 215 (22.0)                         |
| 25-29 years                                          | 228 (28.6)        | 416 (29.3)          |         | 48 (35.0)                      | 83 (26.9)                     | 285 (29.2)                         |
| <25 years                                            | 116 (14.5)        | 469 (33.0)          |         | 35 (25.6)                      | 116 (37.7)                    | 318 (32.6)                         |
| <b>Smoking during pregnancy</b> <i>Missing=9</i>     |                   |                     |         |                                |                               |                                    |
| No                                                   | 640 (80.1)        | 949 (67.1)          | ***     | 102 (74.5)                     | 187 (60.9) ***                | 660 (68.0) ***                     |
| Yes                                                  | 159 (19.9)        | 465 (32.9)          |         | 35 (25.5)                      | 120 (39.1)                    | 310 (32.0)                         |
| <b>HOUSEHOLD CHARACTERISTICS</b>                     | <b>799</b>        | <b>1423</b>         |         | <b>137</b>                     | <b>308</b>                    | <b>978</b>                         |
| <b>Marital status</b> <i>Missing=18</i>              |                   |                     |         |                                |                               |                                    |
| Two parent family                                    | 732 (92.1)        | 1161 (82.4)         | ***     | 106 (77.4) ***                 | 247 (81.2) ***                | 808 (83.5) ***                     |
| Sole parent family                                   | 63 (7.9)          | 248 (17.6)          |         | 31 (22.6)                      | 57 (18.8)                     | 160 (16.5)                         |
| <b>Other children in household</b> <i>Missing=14</i> |                   |                     |         |                                |                               |                                    |
| None                                                 | 299 (37.6)        | 471 (33.4)          | ***     | 53 (39.0)                      | 97 (31.8) ***                 | 321 (33.0) ***                     |
| 1-2 children                                         | 431 (54.2)        | 731 (51.7)          |         | 70 (51.5)                      | 154 (50.5)                    | 507 (52.2)                         |
| 3+ children                                          | 65 (8.2)          | 211 (14.9)          |         | 13 (9.5)                       | 54 (17.7)                     | 144 (14.8)                         |
| <b>Household income</b> <i>Missing=354</i>           |                   |                     |         |                                |                               |                                    |
| Highest quintile                                     | 170 (24.0)        | 175 (15.1)          | ***     | 17 (15.2) *                    | 30 (12.1) ***                 | 128 (16.0)***                      |
| 4th quintile                                         | 154 (21.7)        | 206 (17.8)          |         | 31 (27.7)                      | 31 (12.4)                     | 144 (18.1)                         |
| 3rd quintile                                         | 164 (23.1)        | 211 (18.2)          |         | 21 (18.7)                      | 42 (16.9)                     | 148 (18.6)                         |
| 2nd quintile                                         | 129 (18.2)        | 259 (22.3)          |         | 19 (17.0)                      | 65 (26.1)                     | 175 (21.9)                         |
| Lowest quintile                                      | 92 (13.0)         | 308 (26.6)          |         | 24 (21.4)                      | 81 (32.5)                     | 203 (25.4)                         |
| <b>Home ownership</b> <i>Missing=20</i>              |                   |                     |         |                                |                               |                                    |
| Own/mortgage                                         | 427 (53.6)        | 437 (31.1)          | ***     | 62 (45.3)                      | 49 (16.2) ***                 | 326 (33.7) ***                     |
| Rent                                                 | 297 (37.2)        | 740 (52.7)          |         | 57 (41.6)                      | 203 (67.2)                    | 480 (49.7)                         |
| Government/Boarding house                            | 73 (9.2)          | 228 (16.2)          |         | 18 (13.1)                      | 50 (16.6)                     | 160 (16.6)                         |
| <b>CHILD CHARACTERISTICS</b>                         | <b>808</b>        | <b>1437</b>         |         | <b>137</b>                     | <b>309</b>                    | <b>991</b>                         |
| <b>Gender</b> <i>Missing = 49</i>                    |                   |                     |         |                                |                               |                                    |
| Female                                               | 400 (50.1)        | 670 (48.0)          | ns      | 51 (37.5) **                   | 151 (49.7)                    | 468 (48.9)                         |
| Male                                                 | 399 (49.9)        | 727 (52.0)          |         | 85 (62.5)                      | 153 (50.3)                    | 489 (51.1)                         |

Maternal and Household N=2222; Children N=2245 (includes twins)

<sup>a</sup> Each Drop-out participant group compared to the complete participant group as the reference, using chi-squared test.

\*p<0.05 \*\* p<0.01 \*\*\*p <0.0001 ns= not significant

Table 2 Number of injuries, injury rates per 10 person-years (PYs) and Injury Rate Ratios (RRs) with 95% Confidence Intervals (CIs) for the child participants, stratified by follow-up status and types of attrition.

| Child Participants            | N (%)        | Sum Injuries | Injury Rates /10 PYs | Unadjusted RR (95% CI) <sup>a</sup> | Adjusted RR (95% CI) <sup>a,b</sup> |
|-------------------------------|--------------|--------------|----------------------|-------------------------------------|-------------------------------------|
| <b>Total cohort</b>           | 2245 (100.0) | 941          | 2.59                 | 0.99 (0.88-1.13)                    | 0.97 (0.85-1.10)                    |
| <b>Complete follow-up</b>     | 808 (36.0)   | 340          | 2.60                 | Reference                           | Reference                           |
| <b>Incomplete follow-up</b>   | 1437 (64.0)  | 601          | 2.58                 | 0.99 (0.87-1.13)                    | 0.95 (0.82-1.09)                    |
| <b>Withdrawn</b>              | 137 (6.1)    | 80           | 3.48                 | 1.32 (1.03-1.68) *                  | 1.24 (0.96-1.58)                    |
| <b>Lost to follow-up</b>      | 309 (13.8)   | 128          | 2.38                 | 0.89 (0.72-1.09)                    | 0.81 (0.65-1.01)                    |
| <b>Partial/Non-responders</b> | 991 (44.1)   | 393          | 2.51                 | 0.98 (0.85-1.13)                    | 0.94 (0.81-1.10)                    |

<sup>a</sup> Poisson regression, offset = log of length of follow-up time of child.

<sup>b</sup> Adjusted for maternal age, maternal education, maternal smoking status, number of children in household, family marital status, household income, housing status and child gender in two step model. Final model included maternal age, maternal education level and child gender

\*p<0.05

Table 3 Child injury rates per 10 person-years (PYs) for the total cohort and stratified by follow-up status and types of attrition for baseline maternal, household and child characteristics.

|                                                         | Total Cohort<br>/10 PYs | Follow-up           |                       | p-value | Attrition by type <sup>a</sup> |                              |                                   |
|---------------------------------------------------------|-------------------------|---------------------|-----------------------|---------|--------------------------------|------------------------------|-----------------------------------|
|                                                         |                         | Complete<br>/10 PYs | Incomplete<br>/10 PYs |         | Withdrawn<br>/10 PYs           | Lost to Follow-up<br>/10 PYs | Partial/Non Responders<br>/10 PYs |
| <b>MATERNAL CHARACTERISTICS</b>                         |                         |                     |                       |         |                                |                              |                                   |
| <b>Maternal level of education</b> <i>Missing=12</i>    |                         |                     |                       |         |                                |                              |                                   |
| Tertiary degree                                         | 2.03                    | 2.12                | 1.92                  | ns      | 3.06 *                         | 1.72                         | 1.74                              |
| Secondary school or trade                               | 2.70                    | 2.84                | 2.62                  |         | 3.66                           | 2.28                         | 2.57                              |
| Not complete school                                     | 2.73                    | 2.43                | 2.83                  |         | 3.23                           | 2.87                         | 2.77                              |
| <b>Maternal age</b> <i>Missing=3</i>                    |                         |                     |                       |         |                                |                              |                                   |
| 35+ years                                               | 2.02                    | 1.83                | 2.18                  | ns      | 2.83                           | 2.76                         | 1.91                              |
| 30-34 years                                             | 2.67                    | 2.86                | 2.52                  |         | 3.93                           | 1.50                         | 2.55                              |
| 25-29 years                                             | 2.27                    | 2.35                | 2.23                  |         | 2.93                           | 1.69                         | 2.27                              |
| <25 years                                               | 3.27                    | 3.76                | 3.14                  |         | 4.12                           | 3.13                         | 3.04                              |
| <b>Smoking during pregnancy</b> <i>Missing=9</i>        |                         |                     |                       |         |                                |                              |                                   |
| No                                                      | 2.49                    | 2.48                | 2.50                  | ns      | 3.25 *                         | 2.55                         | 2.36                              |
| Yes                                                     | 2.84                    | 3.10                | 2.75                  |         | 4.17                           | 2.15                         | 2.84                              |
| <b>HOUSEHOLD CHARACTERISTICS</b>                        |                         |                     |                       |         |                                |                              |                                   |
| <b>Marital status</b> <i>Missing=18</i>                 |                         |                     |                       |         |                                |                              |                                   |
| Two parent family                                       | 2.45                    | 2.53                | 2.41                  | ns      | 3.36                           | 2.33                         | 2.30                              |
| Sole parent family                                      | 3.44                    | 3.47                | 3.43                  |         | 3.90                           | 2.66                         | 3.64                              |
| <b>Other children in household</b> <i>Missing=14</i>    |                         |                     |                       |         |                                |                              |                                   |
| None                                                    | 2.70                    | 2.84                | 2.61                  | ns      | 3.09 *                         | 2.66                         | 2.51                              |
| 1-2 children                                            | 2.52                    | 2.51                | 2.53                  |         | 3.50                           | 2.30                         | 2.46                              |
| 3+ children                                             | 2.52                    | 1.99                | 2.68                  |         | 4.21                           | 2.17                         | 2.73                              |
| <b>Household income</b> <sup>b</sup> <i>Missing=354</i> |                         |                     |                       |         |                                |                              |                                   |
| Highest quintile                                        | 2.03                    | 2.42                | 1.67                  | ns      | 2.04                           | 1.52                         | 1.65                              |
| 4th quintile                                            | 2.55                    | 2.93                | 2.27                  |         | 2.79                           | 1.95                         | 2.24                              |
| 3rd quintile                                            | 2.45                    | 2.33                | 2.55                  |         | 3.57                           | 2.92                         | 2.27                              |
| 2nd quintile                                            | 2.54                    | 2.32                | 2.65                  |         | 3.74                           | 2.32                         | 2.66                              |
| Lowest quintile                                         | 2.92                    | 3.53                | 2.74                  |         | 3.15                           | 2.36                         | 2.85                              |
| <b>Home ownership</b> <i>Missing=20</i>                 |                         |                     |                       |         |                                |                              |                                   |
| Own/mortgage                                            | 2.41                    | 2.53                | 2.29                  | ns      | 3.68 *                         | 1.47                         | 2.16                              |
| Rent                                                    | 2.46                    | 2.48                | 2.46                  |         | 2.54                           | 2.50                         | 2.43                              |
| Government/Boarding house                               | 3.55                    | 3.39                | 3.60                  |         | 5.85                           | 2.93                         | 3.57                              |
| <b>CHILD CHARACTERISTICS</b>                            |                         |                     |                       |         |                                |                              |                                   |
| <b>Gender</b> <i>Missing = 49</i>                       |                         |                     |                       |         |                                |                              |                                   |
| Female                                                  | 2.18                    | 2.21                | 2.16                  | ns      | 3.13 *                         | 1.89                         | 2.15                              |
| Male                                                    | 3.00                    | 2.87                | 3.07                  |         | 3.74                           | 2.93                         | 2.99                              |

Children N=2245 (includes twins)

<sup>a</sup> Each Drop-out participant group compared to the complete participant group as the reference, using univariate Poisson regression with time offset.

<sup>b</sup> Gross annual household incomes standardised in AUD\$2010 values

\*p<0.05 \*\* p<0.01 \*\*\*p <0.0001 ns=not significant

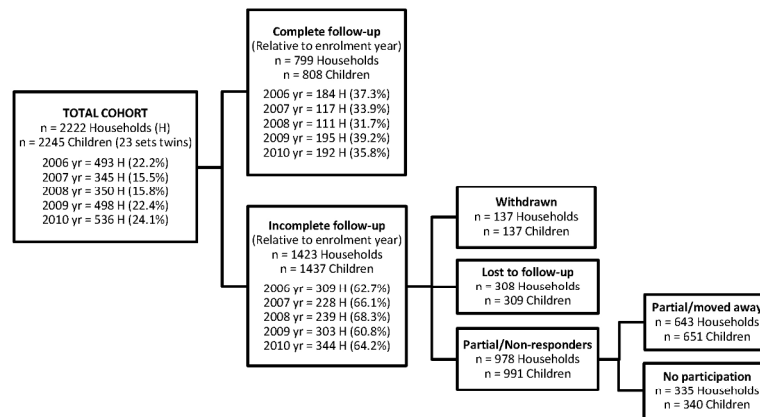

Figure 1 Flow diagram of EFHL cohort attrition status, Queensland participants 2006-2010 (N=2222 Households and N=2245 Children).

297x210mm (200 x 200 DPI)

## STROBE Statement—checklist of items that should be included in reports of observational studies

|                              | Item No | Recommendation                                                                                                                                                                                                                                                                                                                                                                                                                                                         | PAGE                                           |
|------------------------------|---------|------------------------------------------------------------------------------------------------------------------------------------------------------------------------------------------------------------------------------------------------------------------------------------------------------------------------------------------------------------------------------------------------------------------------------------------------------------------------|------------------------------------------------|
| <b>Title and abstract</b>    | 1       | (a) Indicate the study's design with a commonly used term in the title or the abstract                                                                                                                                                                                                                                                                                                                                                                                 | 1                                              |
|                              |         | (b) Provide in the abstract an informative and balanced summary of what was done and what was found                                                                                                                                                                                                                                                                                                                                                                    | 2                                              |
| <b>Introduction</b>          |         |                                                                                                                                                                                                                                                                                                                                                                                                                                                                        |                                                |
| Background/rationale         | 2       | Explain the scientific background and rationale for the investigation being reported                                                                                                                                                                                                                                                                                                                                                                                   | 4                                              |
| Objectives                   | 3       | State specific objectives, including any prespecified hypotheses                                                                                                                                                                                                                                                                                                                                                                                                       | 5                                              |
| <b>Methods</b>               |         |                                                                                                                                                                                                                                                                                                                                                                                                                                                                        |                                                |
| Study design                 | 4       | Present key elements of study design early in the paper                                                                                                                                                                                                                                                                                                                                                                                                                | 5                                              |
| Setting                      | 5       | Describe the setting, locations, and relevant dates, including periods of recruitment, exposure, follow-up, and data collection                                                                                                                                                                                                                                                                                                                                        | 5-6                                            |
| Participants                 | 6       | (a) <i>Cohort study</i> —Give the eligibility criteria, and the sources and methods of selection of participants. Describe methods of follow-up<br><i>Case-control study</i> —Give the eligibility criteria, and the sources and methods of case ascertainment and control selection. Give the rationale for the choice of cases and controls<br><i>Cross-sectional study</i> —Give the eligibility criteria, and the sources and methods of selection of participants | 6                                              |
|                              |         | (b) <i>Cohort study</i> —For matched studies, give matching criteria and number of exposed and unexposed<br><i>Case-control study</i> —For matched studies, give matching criteria and the number of controls per case                                                                                                                                                                                                                                                 | Na                                             |
| Variables                    | 7       | Clearly define all outcomes, exposures, predictors, potential confounders, and effect modifiers. Give diagnostic criteria, if applicable                                                                                                                                                                                                                                                                                                                               | 6-8                                            |
| Data sources/<br>measurement | 8*      | For each variable of interest, give sources of data and details of methods of assessment (measurement). Describe comparability of assessment methods if there is more than one group                                                                                                                                                                                                                                                                                   | 6-8                                            |
| Bias                         | 9       | Describe any efforts to address potential sources of bias                                                                                                                                                                                                                                                                                                                                                                                                              | <b>Paper about bias</b>                        |
| Study size                   | 10      | Explain how the study size was arrived at                                                                                                                                                                                                                                                                                                                                                                                                                              | 6                                              |
| Quantitative variables       | 11      | Explain how quantitative variables were handled in the analyses. If applicable, describe which groupings were chosen and why                                                                                                                                                                                                                                                                                                                                           | 8-9                                            |
| Statistical methods          | 12      | (a) Describe all statistical methods, including those used to control for confounding                                                                                                                                                                                                                                                                                                                                                                                  | 9                                              |
|                              |         | (b) Describe any methods used to examine subgroups and interactions                                                                                                                                                                                                                                                                                                                                                                                                    | 9                                              |
|                              |         | (c) Explain how missing data were addressed                                                                                                                                                                                                                                                                                                                                                                                                                            | 9                                              |
|                              |         | (d) <i>Cohort study</i> —If applicable, explain how loss to follow-up was addressed<br><i>Case-control study</i> —If applicable, explain how matching of cases and controls was addressed<br><i>Cross-sectional study</i> —If applicable, describe analytical methods taking account of sampling strategy                                                                                                                                                              | <b>Paper about bias from loss to follow-up</b> |
|                              |         | (e) Describe any sensitivity analyses                                                                                                                                                                                                                                                                                                                                                                                                                                  |                                                |

Continued on next page

| <b>Results</b>           |     |                                                                                                                                                                                                                                                                                                                                                                                                               |                                  |
|--------------------------|-----|---------------------------------------------------------------------------------------------------------------------------------------------------------------------------------------------------------------------------------------------------------------------------------------------------------------------------------------------------------------------------------------------------------------|----------------------------------|
| Participants             | 13* | (a) Report numbers of individuals at each stage of study—eg numbers potentially eligible, examined for eligibility, confirmed eligible, included in the study, completing follow-up, and analysed<br>(b) Give reasons for non-participation at each stage<br>(c) Consider use of a flow diagram                                                                                                               | Figure 1<br>Figure 1<br>Figure 1 |
| Descriptive data         | 14* | (a) Give characteristics of study participants (eg demographic, clinical, social) and information on exposures and potential confounders<br>(b) Indicate number of participants with missing data for each variable of interest<br>(c) <i>Cohort study</i> —Summarise follow-up time (eg, average and total amount)                                                                                           | 9-10<br>Table 1<br>9-10          |
| Outcome data             | 15* | <i>Cohort study</i> —Report numbers of outcome events or summary measures over time<br><i>Case-control study</i> —Report numbers in each exposure category, or summary measures of exposure<br><i>Cross-sectional study</i> —Report numbers of outcome events or summary measures                                                                                                                             | Table 3                          |
| Main results             | 16  | (a) Give unadjusted estimates and, if applicable, confounder-adjusted estimates and their precision (eg, 95% confidence interval). Make clear which confounders were adjusted for and why they were included<br>(b) Report category boundaries when continuous variables were categorized<br>(c) If relevant, consider translating estimates of relative risk into absolute risk for a meaningful time period | Table 2, page 11<br>Table 1      |
| Other analyses           | 17  | Report other analyses done—eg analyses of subgroups and interactions, and sensitivity analyses                                                                                                                                                                                                                                                                                                                | 11                               |
| <b>Discussion</b>        |     |                                                                                                                                                                                                                                                                                                                                                                                                               |                                  |
| Key results              | 18  | Summarise key results with reference to study objectives                                                                                                                                                                                                                                                                                                                                                      | 12-13                            |
| Limitations              | 19  | Discuss limitations of the study, taking into account sources of potential bias or imprecision. Discuss both direction and magnitude of any potential bias                                                                                                                                                                                                                                                    | 13-14                            |
| Interpretation           | 20  | Give a cautious overall interpretation of results considering objectives, limitations, multiplicity of analyses, results from similar studies, and other relevant evidence                                                                                                                                                                                                                                    | 13-14                            |
| Generalisability         | 21  | Discuss the generalisability (external validity) of the study results                                                                                                                                                                                                                                                                                                                                         | 14                               |
| <b>Other information</b> |     |                                                                                                                                                                                                                                                                                                                                                                                                               |                                  |
| Funding                  | 22  | Give the source of funding and the role of the funders for the present study and, if applicable, for the original study on which the present article is based                                                                                                                                                                                                                                                 | 14                               |

\*Give information separately for cases and controls in case-control studies and, if applicable, for exposed and unexposed groups in cohort and cross-sectional studies.

**Note:** An Explanation and Elaboration article discusses each checklist item and gives methodological background and published examples of transparent reporting. The STROBE checklist is best used in conjunction with this article (freely available on the Web sites of PLoS Medicine at <http://www.plosmedicine.org/>, Annals of Internal Medicine at <http://www.annals.org/>, and Epidemiology at <http://www.epidem.com/>). Information on the STROBE Initiative is available at [www.strobe-statement.org](http://www.strobe-statement.org).
